# Supplementary material for: An Automated Methodology for Non-targeted Compositional Analysis of Small Molecules in High Complexity Environmental Matrices Using Coupled Ultra Performance Liquid Chromatography Orbitrap Mass Spectrometry
Source: PubMed Central journal article supplement (PMC8277131; doi:10.1021/acs.est.0c08208), 2021-05-18
Supplement: es0c08208_si_001.pdf [file es0c08208_si_001.pdf]

# An automated methodology for non-targeted compositional analysis of small molecules in high complexity environmental matrices using coupled ultra-performance liquid chromatography Orbitrap mass spectrometry

*Kelly L. Pereira<sup>1\*</sup>, Martyn W. Ward<sup>1</sup>, John L. Wilkinson<sup>2</sup>, Jonathan Brett Sallach<sup>2</sup>, Daniel J. Bryant<sup>1</sup>, William J. Dixon<sup>1</sup>, Jacqueline F. Hamilton<sup>1</sup>, Alastair C. Lewis<sup>1</sup>*

<sup>1</sup>Wolfson Atmospheric Chemistry Laboratories, Department of Chemistry, University of York, York, YO10 5DD, UK. <sup>2</sup>Department of Environment and Geography, University of York, York, YO10 5NG, UK

\*Corresponding author; e-mail: kelly.pereira@york.ac.uk, phone: +44 (0)1904 321220

**Supplementary Information, Number of Pages: 34**

## **Contents:**

1. UPLC-MS Method
2. Data Processing Program
3. Removal of Artefacts
4. Sodium Adduct Detection
5. Software Notes
6. Tables S1 to S11
7. Figures S1 to S10

1 **1. UPLC-MS Method.** Compound separation was achieved using a 100 mm × 2.1 mm reverse  
2 phase C<sub>18</sub> polar end-capped column with a 2.6 μm particle size (Accucore aQ, ThermoFisher  
3 Scientific). The use of a polar extraction solvent and a reverse-phase C<sub>18</sub> column for the analysis  
4 of organic aerosol is common practice (*e.g.* <sup>1-3</sup>). This combination allows highly oxidized species  
5 to be extracted from the sample (often of considerable interest<sup>4</sup>), whilst allowing the separation of  
6 less oxidized larger molecular weight compounds such as oligomers, which can represent a major  
7 component of organic aerosol<sup>5</sup>. The mobile phase consisted of water with 0.1% (v/v) of formic  
8 acid (98% purity, Acros Organics) (A) and methanol (B) (optima LC-MS grade). Gradient elution  
9 was used, starting at 90% (A) with a 1-minute post-injection hold, decreasing to 10% (A) at 26  
10 minutes, returning to the starting mobile phase conditions at 28 minutes, followed by a 2-minute  
11 hold allowing the re-equilibration of the column. The flow rate was set to 0.3 mL/min. A sample  
12 injection volume of 2 μL was used for the analysis of the standards and PM<sub>2.5</sub> samples. The sample  
13 injection volume was increased to 6 μL for the analysis of the surface water samples and  
14 corresponding standard calibrations. The sample sequence was run in the following order: solvent  
15 blanks, calibration standards, procedural blanks and environmental samples. A quality control  
16 standard consisting of the standard mixture at a concentration of 1 ppm was run multiple times  
17 throughout the sequence to monitor for instrument sensitivity and drift. Solvent blanks were run  
18 at the beginning of the sequence and every ~6 injections, including after the highest concentration  
19 standard and more frequently during the analysis of the environmental samples (every 3  
20 injections). The analyses were completed within ~2 days, with an uninterrupted analysis sequence  
21 (*i.e.* the analysis of all standard calibrations and environmental samples were performed at the  
22 same time). The column temperature was set to 40 °C. Samples were stored in a temperature-  
23 controlled autosampler tray during analysis, which was set to 4 °C. Heated electrospray ionization

24 was used. The capillary and auxiliary gas heater temperatures were set to 320 °C, with a sheath  
25 gas flow rate of 70 (arb.) and an auxiliary gas flow rate of 3 (arb.). Spectra were acquired in  
26 negative and positive ionization mode with a scan range of mass-to-charge ( $m/z$ ) 85 to 750.  
27 Tandem mass spectrometry was performed using higher-energy collision dissociation with a  
28 stepped normalized collision energy of 65, 115. The isolation window was set to  $m/z$  2.0 with a  
29 loop count of 10, selecting the 10 most abundant species for fragmentation in each scan. The  
30 chromatographic peak width was set to 6 seconds (full width at half maximum, FWHM) with an  
31 apex trigger of 2 to 4 seconds.

32 **2. Data Processing Program.** The data processing program requires users to select which data  
33 files are ‘blanks’ (including solvent/instrument and method procedural blanks) and ‘samples’. The  
34 program will then remove any artefacts detected in the blanks from the sample data, if a sample  
35 compound has the following features in common: (i) same detected molecular species (*i.e.*  
36 deprotonated, protonated, sodiated) (ii)  $m/z$  ratio within 2 ppm mass accuracy, (iii) retention time  
37 within  $\pm 0.1$  minutes and, (iv) sample/artefact peak area ratio  $> 3$ . Any artefacts detected in the  
38 instrument and procedural blanks were removed from the sample data. Further, any compounds  
39 which were assigned a molecular formula outside the following tolerances were excluded from the  
40 data set: oxygen-to-carbon (O/C) ratio 0.05 to 2 and hydrogen-to-carbon (H/C) ratio of 0.5 to 3.  
41 For the surface water samples, the minimum H/C ratio was decreased to 0.33, allowing less  
42 oxidized species to be included. The data program calculates the following environmental  
43 chemical metrics: H/C ratio, O/C ratio, double bond equivalency (DBE)<sup>6</sup>, DBE vs carbon  
44 (DBE/C)<sup>6</sup>, aromaticity index ( $rAl_{mod}$ )<sup>7</sup> and the average carbon oxidation state ( $\overline{OSc}$ )<sup>8</sup>. In addition  
45 to these calculations, the data program outputs several compositional groupings to allow for the  
46 rapid comparison of sample compositions, see below for further information.

47

48 For the analysis of PM, all detected compounds in each sample were grouped by their elemental  
49 composition and the number of carbon atoms in each molecular formula. The elemental groupings  
50 included compounds containing CHO, CHON, CHONS and CHOS. Carbon number groupings  
51 consisted of C<sub>2</sub> and C<sub>3</sub>, C<sub>4</sub> and C<sub>5</sub>, C<sub>6</sub> to C<sub>8</sub>, C<sub>9</sub> to C<sub>10</sub>, C<sub>11</sub> to C<sub>15</sub>, C<sub>16</sub> to C<sub>20</sub> and C<sub>21</sub> >. The carbon  
52 number groupings were selected to represent potential compound classes and/or sources of  
53 abundant species in ambient air. For example, the C<sub>4</sub> and C<sub>5</sub> grouping may be indicative of isoprene  
54 oxidation products, C<sub>6</sub> to C<sub>8</sub> grouping of aromatic species, C<sub>9</sub> and C<sub>10</sub> grouping of monoterpene  
55 oxidation products and the C<sub>11</sub> to C<sub>15</sub> grouping may include potential sesquiterpene oxidation  
56 products. The peak areas of each compound were normalized to the total peak area in each sample,  
57 allowing the relative abundance of the chemical groupings between samples to be compared.

58

59 For the surface water samples, the data program was designed to output the chemical composition  
60 using the commonly reported literature groupings, including: (i) aromatic compounds ( $0.66 >$   
61  $AI_{\text{mod}} > 0.5$ )<sup>6</sup>, (ii) polycyclic aromatics ( $AI_{\text{mod}} > 0.66$  and  $C < 14$ ), (iii) combustion derived black  
62 carbon polycyclic aromatics ( $AI_{\text{mod}} > 0.66$  and  $C > 15$ ), (iv) unsaturated aliphatic compounds  
63 containing nitrogen, including peptides ( $2 > H/C > 1.5$  and N atom number = 0), (v) unsaturated  
64 aliphatic compounds ( $2 \geq H/C$  ratio  $> 1.5$  and N atom number = 0), (vi) highly unsaturated  
65 compounds, including lignin degradation products<sup>9</sup> and carboxyl-rich alicyclic molecules<sup>10</sup> ( $AI_{\text{mod}}$   
66  $< 0.5$  and H/C ratio  $< 1.5$ ), (vii) saturated compounds, including lipids (H/C ratio  $> 2$  and O/C ratio  
67  $< 0.9$ ) and (viii) saturated compounds, including carbohydrates (H/C ratio  $> 2$  and O/C ratio  $> 0.9$ ).  
68 To aid in the compositional interpretation of the surface water samples, any compounds which  
69 were identified by the commercial MS<sup>2</sup> library (*i.e.* mzCloud) with spectral matches  $> 85\%$

70 confidence were manually grouped into potential pollutant source categories. These categories  
71 were selected based on the normalized sample abundance of the tentatively identified compounds  
72 and included: (i) industrial chemicals, (ii) pharmaceuticals, (iii) stimulants, (iv) fatty acids, (v)  
73 tobacco-related, (vi) plant hormones and (vii) human and animal waste (*e.g.* sewage). N,N-diethyl-  
74 meta-toluamide (*i.e.* DEET) was included as a separate group due to its abundance in several  
75 surface water samples. Any compounds which could not be described by the above categories were  
76 included in a separate grouping labelled ‘not assigned’.

77 The data program outputs into an excel-readable format, allowing users who are not experienced  
78 in Python to use the method. Removed system artefacts are recorded in a separate excel sheet to  
79 allow the data to be checked. A trial license of Compound Discoverer can be obtained from the  
80 manufacturer’s website (<https://thermo.flexnetoperations.com/>), to allow users to test the  
81 developed method for their application.

82

83 **3. Removal of System Artefacts.** Artefacts introduced into the sample data from the  
84 instrumentation and/or extraction procedure (*i.e.* background compounds) can be performed in  
85 Compound Discoverer *via* the ‘group unknown compounds’ node, see Figure S1. This node groups  
86 compounds in all data files with the same  $m/z$  ratio (within a specified mass accuracy) and set  
87 retention time window. The grouping of unknown compounds, particularly within highly complex  
88 sample matrices however, results in isomeric species with similar retention times being incorrectly  
89 reported as the same compound. To overcome this, the retention time window in the group  
90 unknown compounds node was set to 0 minutes, preventing the grouping of any compounds unless  
91 detected at the same retention time. This restriction however, prevented the software from  
92 removing background compounds from the sample data. To overcome this, the developed data-

93 processing program was used. The data processing program uses a more restrictive criteria to  
94 identify system artefacts in the sample data, minimizing the number of sample components which  
95 may be determined to be background compounds (see section ‘data processing program’ for further  
96 information).

97

98 **4. Sodium Adduct Detection.** The method initially searches for protonated molecular species in  
99 positive ionization mode. If detected, the software then searches for sodium adduct. Consequently,  
100 the software cannot detect any compounds which are exclusively observed as  $[M+Na]^+$  in positive  
101 ionization mode. There were 11 standards which were exclusively detected as  $[M+Na]^+$  species  
102 (determined *via* manual analysis). The method was unable to detect the chromatographic peaks for  
103 9 out of the 11 compounds. The other 2 compounds, hexanedioic acid and cyclohexane-1,4-  
104 dicarboxylic acid, were observed as  $[M+H]^+$  species *via* manual analysis but were excluded from  
105 the data set as the chromatographic peaks were determined to be <LOD. The non-targeted method  
106 integrates chromatographic peaks using a filtered extracted ion chromatogram trace, which  
107 smooths the chromatographic peak by summing the centroids found for each data point. This  
108 smoothing algorithm was not used for manual analysis. Chromatographic peaks were instead  
109 manually integrated, allowing the integration capabilities of the software to be evaluated. The use  
110 of the two different chromatographic integration techniques, resulted in a slight variation in the  
111 cut-off point for the applied  $3 \times S/N$  ratio between the two methods. This variation resulted in the  
112 detection of protonated hexanedioic acid and cyclohexane-1,4-dicarboxylic acid using the non-  
113 targeted method, subsequently, resulting in the detection of the sodium adducts. The  $[M+Na]^+$   
114 chromatographic peaks of camphorsulfonic acid and 2-methyl-4-nitrophenol were however, not  
115 detected by the non-targeted method, despite the detection of the protonated adducts. The  $[M+Na]^+$

116 chromatographic peaks of camphorsulfonic acid and 2-methyl-4-nitrophenol were clearly visible  
117 in the chromatograms, with an S/N ratio of 243 and 25, respectively (determined *via* manual  
118 analysis); it is unclear why the software did not detect these species.

119

120 **5. Software Notes.** In the initial design of our method, the S/N ratio threshold was set to 3 in the  
121 select spectra and detect unknown compounds node (see Figure S1). Interestingly, it was found  
122 that restricting the S/N threshold to 3 in the select spectra node, increased the number of low  
123 concentration species which were incorrectly determined to be below the LOD. It is therefore  
124 recommended that the S/N threshold is set to 0 in the select spectra node and 3 in the detect  
125 unknown compounds node, effectively bypassing this initial restriction.

**Table S1** - Compound names, manufacturer and purity of the standards.

| Compound name                   | Manufacturer | Purity | CAS number | MW     | MF                                            |
|---------------------------------|--------------|--------|------------|--------|-----------------------------------------------|
| cyclohex-2-en-1-one             | a            | 95.0   | 930-68-7   | 96.13  | C <sub>6</sub> H <sub>8</sub> O               |
| furan-2,5-dione                 | B            | 99.0   | 108-31-6   | 98.06  | C <sub>4</sub> H <sub>2</sub> O <sub>3</sub>  |
| propanedioic acid               | a            | 99.0   | 141-82-2   | 104.06 | C <sub>3</sub> H <sub>4</sub> O <sub>4</sub>  |
| (Z)-but-2-enedioic acid         | B            | 99.0   | 110-16-7   | 116.07 | C <sub>4</sub> H <sub>4</sub> O <sub>4</sub>  |
| 4-oxopentanoic acid             | B            | 97.0   | 123-76-2   | 116.12 | C <sub>5</sub> H <sub>8</sub> O <sub>3</sub>  |
| butanedioic acid                | a            | 99.0   | 110-15-6   | 118.09 | C <sub>4</sub> H <sub>6</sub> O <sub>4</sub>  |
| 2-hydroxy-3-methylbutanoic acid | A            | 99.0   | 4026-18-0  | 118.13 | C <sub>5</sub> H <sub>10</sub> O <sub>3</sub> |
| 2-methylbenzaldehyde            | a            | 97.0   | 529-20-4   | 120.15 | C <sub>8</sub> H <sub>8</sub> O               |
| 4-methylbenzaldehyde            | a            | 97.0   | 104-87-0   | 120.15 | C <sub>8</sub> H <sub>8</sub> O               |
| benzoic acid                    | a            | 99.5   | 65-85-0    | 122.12 | C <sub>7</sub> H <sub>6</sub> O <sub>2</sub>  |
| 4-methylbenzene-1,2-diol        | a            | 95.0   | 452-86-8   | 124.14 | C <sub>7</sub> H <sub>8</sub> O <sub>2</sub>  |
| 3-methylbenzene-1,2-diol        | a            | 98.0   | 488-17-5   | 124.14 | C <sub>7</sub> H <sub>8</sub> O <sub>2</sub>  |
| octan-2-one                     | B            | 97.0   | 111-13-7   | 128.21 | C <sub>8</sub> H <sub>16</sub> O              |
| (Z)-2-methylbut-2-enedioic acid | a            | 98.0   | 498-23-7   | 130.10 | C <sub>5</sub> H <sub>6</sub> O <sub>4</sub>  |
| Pentanedioic acid               | a            | 99.0   | 110-94-1   | 132.11 | C <sub>5</sub> H <sub>8</sub> O <sub>4</sub>  |
| dimethyl propanedioate          | C            | 99.0   | 108-59-8   | 132.11 | C <sub>5</sub> H <sub>8</sub> O <sub>4</sub>  |
| 2-ethoxyethyl acetate           | C            | 99.0   | 111-15-9   | 132.16 | C <sub>6</sub> H <sub>12</sub> O <sub>3</sub> |
| 2-hydroxyhexanoic acid          | C            | 95.0   | 6064-63-7  | 132.16 | C <sub>6</sub> H <sub>12</sub> O <sub>3</sub> |
| 2,5-dimethylbenzaldehyde        | a            | 99.0   | 5779-94-2  | 134.18 | C <sub>9</sub> H <sub>10</sub> O              |
| 4-methoxybenzaldehyde           | a            | 98.0   | 123-11-5   | 136.15 | C <sub>8</sub> H <sub>8</sub> O <sub>2</sub>  |
| 4-methylbenzoic acid            | C            | 98.0   | 99-94-5    | 136.15 | C <sub>8</sub> H <sub>8</sub> O <sub>2</sub>  |
| 3-methylbenzoic acid            | a            | 99.0   | 99-04-7    | 136.15 | C <sub>8</sub> H <sub>8</sub> O <sub>2</sub>  |
| 2-hydroxybenzoic acid           | a            | 99.0   | 69-72-7    | 138.12 | C <sub>7</sub> H <sub>6</sub> O <sub>3</sub>  |
| 4-nitrophenol                   | A            | 99.0   | 100-02-7   | 139.11 | C <sub>6</sub> H <sub>5</sub> NO <sub>3</sub> |
| 3-nitrophenol                   | C            | 99.0   | 554-84-7   | 139.11 | C <sub>6</sub> H <sub>5</sub> NO <sub>3</sub> |
| hexanedioic acid                | a            | 99.0   | 124-04-9   | 146.14 | C <sub>6</sub> H <sub>10</sub> O <sub>4</sub> |
| (E)-3-phenylprop-2-enoic acid   | C            | 99.0   | 140-10-3   | 148.16 | C <sub>9</sub> H <sub>8</sub> O <sub>2</sub>  |
| 2-formylbenzoic acid            | a            | 97.0   | 119-67-5   | 150.13 | C <sub>8</sub> H <sub>6</sub> O <sub>3</sub>  |
| 4-methoxybenzoic acid           | a            | 99.0   | 100-09-4   | 152.15 | C <sub>8</sub> H <sub>8</sub> O <sub>3</sub>  |
| 2-methyl-5-nitrophenol          | E            | 98.0   | 5428-54-6  | 153.14 | C <sub>7</sub> H <sub>7</sub> NO <sub>3</sub> |
| 4-methyl-3-nitrophenol          | C            | 98.0   | 2042-14-0  | 153.14 | C <sub>7</sub> H <sub>7</sub> NO <sub>3</sub> |
| 4-methyl-2-nitrophenol          | a            | 97.0   | 119-33-5   | 153.14 | C <sub>7</sub> H <sub>7</sub> NO <sub>3</sub> |
| 2-methyl-4-nitrophenol          | a            | 97.0   | 99-53-6    | 153.14 | C <sub>7</sub> H <sub>7</sub> NO <sub>3</sub> |
| 5-methyl-2-nitrophenol          | C            | 97.0   | 700-38-9   | 153.14 | C <sub>7</sub> H <sub>7</sub> NO <sub>3</sub> |
| 2-methyl-3-nitrophenol          | E            | 98.0   | 5460-31-1  | 153.14 | C <sub>7</sub> H <sub>7</sub> NO <sub>3</sub> |

MW = molecular weight. MF = molecular formula. a = Sigma Aldrich, UK; b = Honeywell Fluka, UK; c = Fisher Scientific, UK; e = Fluorochem, UK; f = Tokyo Chemical Industry (TCI), UK.



**Table S1** (continued) - Compound names, manufacturer and purity of the standards.

| Compound name                      | Manufacturer | Purity | CAS number | MW     | MF                                                          |
|------------------------------------|--------------|--------|------------|--------|-------------------------------------------------------------|
| 3-methyl-4-nitrophenol             | f            | 98.0   | 2581-34-2  | 153.14 | C <sub>7</sub> H <sub>7</sub> NO <sub>3</sub>               |
| 3-methyl-2-nitrophenol             | e            | 95.0   | 4920-77-8  | 153.14 | C <sub>7</sub> H <sub>7</sub> NO <sub>3</sub>               |
| 2,5-dihydroxybenzoic acid          | c            | 99.0   | 490-79-9   | 154.12 | C <sub>7</sub> H <sub>6</sub> O <sub>4</sub>                |
| 2,6-dimethoxyphenol                | a            | 99.0   | 91-10-1    | 154.16 | C <sub>8</sub> H <sub>10</sub> O <sub>3</sub>               |
| (3R)-3,7-dimethyloct-6-enal        | a            | 95.0   | 2385-77-5  | 154.25 | C <sub>10</sub> H <sub>18</sub> O                           |
| 2-nitrobenzene-1,3-diol            | a            | 98.0   | 601-89-8   | 155.11 | C <sub>6</sub> H <sub>5</sub> NO <sub>4</sub>               |
| 4-nitrobenzene-1,2-diol            | a            | 97.0   | 3316-09-4  | 155.11 | C <sub>6</sub> H <sub>5</sub> NO <sub>4</sub>               |
| nonanoic acid                      | a            | 97.0   | 112-05-0   | 158.24 | C <sub>9</sub> H <sub>18</sub> O <sub>2</sub>               |
| heptanedioic acid                  | c            | 98.0   | 111-16-0   | 160.17 | C <sub>7</sub> H <sub>12</sub> O <sub>4</sub>               |
| levoglucosan                       | a            | 99.0   | 498-07-7   | 162.14 | C <sub>6</sub> H <sub>10</sub> O <sub>5</sub>               |
| 1,2-benzenedioic acid              | a            | 99.5   | 88-99-3    | 166.13 | C <sub>8</sub> H <sub>6</sub> O <sub>4</sub>                |
| 2,6-dimethyl-4-nitrophenol         | a            | 98.0   | 2423-71-4  | 167.16 | C <sub>8</sub> H <sub>9</sub> NO <sub>3</sub>               |
| 1,3,5-trimethoxybenzene            | a            | 99.0   | 621-23-8   | 168.19 | C <sub>9</sub> H <sub>12</sub> O <sub>3</sub>               |
| 2-methoxy-4-nitrophenol            | a            | 97.0   | 3251-56-7  | 169.13 | C <sub>7</sub> H <sub>7</sub> NO <sub>4</sub>               |
| cyclohexane-1,4-dicarboxylic acid  | c            | 99.0   | 1076-97-7  | 172.18 | C <sub>8</sub> H <sub>12</sub> O <sub>4</sub>               |
| octanedioic acid                   | c            | 99.0   | 505-48-6   | 174.19 | C <sub>8</sub> H <sub>14</sub> O <sub>4</sub>               |
| 2-hydroxy-5-nitrobenzoic acid      | a            | 99.0   | 96-97-9    | 183.12 | C <sub>7</sub> H <sub>5</sub> NO <sub>5</sub>               |
| 2,4-dinitrophenol                  | a            | 97.0   | 51-28-5    | 184.11 | C <sub>6</sub> H <sub>4</sub> N <sub>2</sub> O <sub>5</sub> |
| cis-pinonic acid                   | a            | 98.0   | 61826-55-9 | 184.23 | C <sub>10</sub> H <sub>16</sub> O <sub>3</sub>              |
| nonanedioic acid                   | c            | 98.0   | 123-99-9   | 188.22 | C <sub>9</sub> H <sub>16</sub> O <sub>4</sub>               |
| (4-formyl-2-methoxyphenyl) acetate | a            | 97.0   | 881-68-5   | 194.18 | C <sub>10</sub> H <sub>10</sub> O <sub>4</sub>              |
| naphthalene-2,3-dicarboxylic acid  | a            | 95.0   | 2169-87-1  | 216.19 | C <sub>12</sub> H <sub>8</sub> O <sub>4</sub>               |
| 2,3-diacetyloxypropyl acetate      | c            | 99.0   | 102-76-1   | 218.20 | C <sub>9</sub> H <sub>14</sub> O <sub>6</sub>               |
| β-caryophyllene epoxide            | a            | 99.0   | 1139-30-6  | 220.35 | C <sub>15</sub> H <sub>24</sub> O                           |
| 1s-(+)-camphorsulfonic acid        | a            | 99.0   | 3144-16-9  | 232.30 | C <sub>10</sub> H <sub>16</sub> O <sub>4</sub> S            |

MW = molecular weight. MF = molecular formula. a = Sigma Aldrich, UK; b = Honeywell Fluka, UK; c = Fisher Scientific, UK; e = Fluorochem, UK; f = Tokyo Chemical Industry (TCI), UK.

**Table S2** – Particulate matter sample sampling dates, times and the volume of air sampled during sample collection.

| <i>Winter</i>                           |          |          |          |          |
|-----------------------------------------|----------|----------|----------|----------|
| Sample number                           | 94       | 96       | 98       | 100      |
| Sampling start date (DD:MM:YY)          | 29/11/16 | 29/11/16 | 30/11/16 | 30/11/16 |
| Sampling end date (DD:MM:YY)            | 29/11/16 | 30/11/16 | 30/11/16 | 01/12/16 |
| Sampling start time (HH:MM)             | 11:35    | 17:38    | 11:33    | 17:35    |
| Sampling end time (HH:MM)               | 14:31    | 08:29    | 14:26    | 08:30    |
| Sampling duration (HH:MM)               | 02:56    | 14:51    | 02:53    | 14:55    |
| Sampling duration (min)                 | 176      | 891      | 173      | 895      |
| Volume of air sampled (m <sup>3</sup> ) | 234.7    | 1188.0   | 230.7    | 1193.3   |
| <i>Summer</i>                           |          |          |          |          |
| Sample number                           | 261*     | 264*     | 271*     | 274*     |
| Sampling start date (DD:MM:YY)          | 17/06/17 | 17/06/17 | 18/06/17 | 18/06/17 |
| Sampling end date (DD:MM:YY)            | 17/06/17 | 18/06/17 | 18/06/17 | 19/06/17 |
| Sampling start time (HH:MM)             | 14:28    | 18:30    | 14:36    | 17:30    |
| Sampling end time (HH:MM)               | 15:23    | 08:34    | 15:24    | 08:36    |
| Sampling duration (HH:MM)               | 00:55    | 14:04    | 00:48    | 15:06    |
| Sampling duration (min)                 | 55       | 844      | 48       | 906      |
| Volume of air sampled (m <sup>3</sup> ) | 73.3     | 1125.3   | 64.0     | 1208.0   |

\*Same samples as those analyzed in Bryant et al. 2019.

**Table S3** – Surface water sample descriptions and collection locations.

| Sample ID | Sample description                                             | Country   | City      | River    | Co-ordinates (Lat. Long.) (if known) |
|-----------|----------------------------------------------------------------|-----------|-----------|----------|--------------------------------------|
| S1        | Industrial effluent                                            | Sri Lanka | Colombo   | -        | -                                    |
| S2        | Hong Kong (sewage and building construction influence)         | China     | Hong Kong | Kai Tak  | 22° 19' 45.8" N, 114° 11' 53.9" E    |
| S3        | Wastewater treatment plant effluent, WWTP                      | Sri Lanka | Colombo   | -        | -                                    |
| S4        | Guangzhou (pharmaceuticals, agricultural and sewage influence) | China     | Guangzhou | Zhujiang | 23° 07' 23.2" N, 113° 12' 33.8" E    |
| S5        | Nagpur (upstream of two major hospitals)                       | India     | Nagpur    | Nag      | 21° 07' 48.0" N, 79° 03' 03.5" E     |
| S6        | Nagpur (downstream of two major hospitals)                     | India     | Nagpur    | Nag      | 21° 08' 23.9" N, 79° 04' 48.5" E     |
| S7        | Nagpur (downstream of S6, post River Pili confluence)          | India     | Nagpur    | Nag      | 21° 08' 16.4" N, 79° 05' 09.2" E     |

**Table S4** – Compound Discoverer library used for the detection of ESI artefacts.

| <b>Adduct</b>        | <b>Adduct Mass (Da)</b> | <b>Charge</b> |
|----------------------|-------------------------|---------------|
| M-H-H <sub>2</sub> O | -19.01784               | -1            |
| M+H-H <sub>2</sub> O | -17.00329               | 1             |
| M+H-NH <sub>3</sub>  | -16.01927               | 1             |
| M-2H                 | -2.01455                | -2            |
| M-H                  | -1.00728                | -1            |
| 2M-H                 | -1.00728                | -1            |
| M+H                  | 1.00728                 | 1             |
| 2M+H                 | 1.00728                 | 1             |
| M+2H                 | 2.01455                 | 2             |
| M+3H                 | 3.02183                 | 3             |
| M+NH <sub>4</sub>    | 18.03383                | 1             |
| 2M+NH <sub>4</sub>   | 18.03383                | 1             |
| M+H+NH <sub>4</sub>  | 19.0411                 | 2             |
| M+Na                 | 22.98922                | 1             |
| 2M+Na                | 22.98922                | 1             |
| M+H+Na               | 23.9965                 | 2             |
| M+H+MeOH             | 33.03349                | 1             |
| M+Cl                 | 34.9694                 | -1            |
| M-2H+K               | 36.94861                | -1            |
| M+K                  | 38.96316                | 1             |
| 2M+K                 | 38.96316                | 1             |
| M+H+K                | 39.97044                | 2             |
| M+H+ACN              | 42.03383                | 1             |
| 2M+H+ACN             | 42.03383                | 1             |
| M+2H+ACN             | 43.0411                 | 2             |
| M-H+FA               | 44.9982                 | -1            |
| 2M-H+FA              | 44.9982                 | -1            |
| M-H+HAc              | 59.01385                | -1            |
| 2M-H+HAc             | 59.01385                | -1            |
| M+Na+ACN             | 64.01577                | 1             |
| 2M+Na+ACN            | 64.01577                | 1             |
| M+H+DMSO             | 79.02121                | 1             |
| M-H+TFA              | 112.98559               | -1            |

**Table S5**– Retention time and the type of molecular species detected for each standard at a concentration of 1 ppm determined *via* manual analysis.

| Compound name                     | Retention time (min) | (M-H) <sup>-</sup> | (M+H) <sup>+</sup> | (M+Na) <sup>+</sup> |
|-----------------------------------|----------------------|--------------------|--------------------|---------------------|
| levoglucosan                      | 0.75                 |                    |                    | ✓                   |
| propanedioic acid                 | 0.83                 | ✓                  |                    |                     |
| (Z)-but-2-enedioic acid           | 0.86                 | ✓                  |                    |                     |
| butanedioic acid                  | 0.99                 | ✓                  |                    | ✓                   |
| (Z)-2-methylbut-2-enedioic acid   | 1.22                 | ✓                  |                    |                     |
| 4-oxopentanoic acid               | 1.27                 | ✓                  |                    | ✓                   |
| pentanedioic acid                 | 1.33                 | ✓                  |                    | ✓                   |
| furan-2,5-dione                   | 1.37                 | ✓                  | ✓                  |                     |
| 2-hydroxy-3-methylbutanoic acid   | 2.40                 | ✓                  |                    | ✓                   |
| hexanedioic acid                  | 2.41                 | ✓                  |                    | ✓                   |
| dimethyl propanedioate            | 2.68                 |                    | ✓                  | ✓                   |
| 2,5-dihydroxybenzoic acid         | 3.04                 | ✓                  | ✓                  |                     |
| 2-formylbenzoic acid              | 3.75                 | ✓                  | ✓                  | ✓                   |
| 1,2-benzenedioic acid             | 3.80                 | ✓                  | ✓                  | ✓                   |
| cyclohex-2-en-1-one               | 4.13                 |                    | ✓                  |                     |
| 1s-(+)-camphorsulfonic acid       | 4.32                 | ✓                  | ✓                  | ✓                   |
| 4-nitrobenzene-1,2-diol           | 4.61                 | ✓                  |                    |                     |
| heptanedioic acid                 | 4.74                 | ✓                  |                    | ✓                   |
| 4-methylbenzene-1,2-diol          | 4.85                 | ✓                  |                    |                     |
| 2-ethoxyethyl acetate             | 5.24                 |                    |                    | ✓                   |
| 3-methylbenzene-1,2-diol          | 5.33                 | ✓                  |                    |                     |
| 2-hydroxyhexanoic acid            | 5.57                 | ✓                  |                    | ✓                   |
| 2-nitrobenzene-1,3-diol           | 5.75                 | ✓                  |                    |                     |
| cyclohexane-1,4-dicarboxylic acid | 5.88                 | ✓                  |                    | ✓                   |
| 4-nitrophenol                     | 6.54                 | ✓                  |                    |                     |
| 2-hydroxy-5-nitrobenzoic acid     | 6.57                 | ✓                  |                    |                     |
| 3-nitrophenol                     | 7.02                 | ✓                  |                    |                     |
| 2,3-diacetyloxypropyl acetate     | 7.23                 |                    |                    | ✓                   |
| 2,6-dimethoxyphenol               | 7.29                 |                    | ✓                  | ✓                   |
| octanedioic acid                  | 7.67                 | ✓                  | ✓                  | ✓                   |
| 2,4-dinitrophenol                 | 7.72                 | ✓                  |                    |                     |
| 2-methoxy-4-nitrophenol           | 7.90                 | ✓                  | ✓                  | ✓                   |
| benzoic acid                      | 7.93                 | ✓                  |                    |                     |
| 2-hydroxybenzoic acid             | 7.93                 | ✓                  |                    |                     |
| cis-pinonic acid                  | 8.27                 | ✓                  | ✓                  | ✓                   |

**Table S5** (continued) – Retention time and the type of molecular species detected for each standard at a concentration of 1 ppm determine *via* manual analysis.

| Compound name                      | Retention time (min) | (M-H) <sup>-</sup> | (M+H) <sup>+</sup> | (M+Na) <sup>+</sup> |
|------------------------------------|----------------------|--------------------|--------------------|---------------------|
| 4-methoxybenzoic acid              | 9.28                 | ✓                  | ✓                  |                     |
| 4-methoxybenzaldehyde              | 9.29                 |                    | ✓                  |                     |
| (4-formyl-2-methoxyphenyl) acetate | 9.36                 |                    | ✓                  | ✓                   |
| 3-methyl-4-nitrophenol             | 9.59                 | ✓                  | ✓                  |                     |
| 2-methyl-3-nitrophenol             | 9.99                 | ✓                  |                    |                     |
| 3-methyl-2-nitrophenol             | 10.08                | ✓                  |                    |                     |
| 4-methyl-3-nitrophenol             | 10.21                | ✓                  |                    |                     |
| nonanedioic acid                   | 10.50                | ✓                  | ✓                  | ✓                   |
| 2-methyl-4-nitrophenol             | 10.69                | ✓                  | ✓                  | ✓                   |
| naphthalene-2,3-dicarboxylic acid  | 10.84                | ✓                  | ✓                  | ✓                   |
| 2-methyl-5-nitrophenol             | 11.28                | ✓                  |                    |                     |
| 4-methylbenzaldehyde               | 11.33                |                    | ✓                  |                     |
| 2-methylbenzaldehyde               | 11.38                |                    | ✓                  |                     |
| 4-methylbenzoic acid               | 11.57                | ✓                  | ✓                  |                     |
| 3-methylbenzoic acid               | 11.62                | ✓                  | ✓                  |                     |
| (E)-3-phenylprop-2-enoic acid      | 11.76                | ✓                  |                    |                     |
| 2,6-dimethyl-4-nitrophenol         | 12.93                | ✓                  | ✓                  | ✓                   |
| 4-methyl-2-nitrophenol             | 13.16                | ✓                  |                    |                     |
| 5-methyl-2-nitrophenol             | 13.17                | ✓                  |                    |                     |
| 1,3,5-trimethoxybenzene            | 13.29                |                    | ✓                  |                     |
| 2,5-dimethylbenzaldehyde           | 14.88                |                    | ✓                  |                     |
| octan-2-one                        | 16.28                |                    | ✓                  |                     |
| (3R)-3,7-dimethyloct-6-enal        | 18.89                |                    | ✓                  |                     |
| nonanoic acid                      | 19.31                | ✓                  |                    |                     |
| β-caryophyllene epoxide            | 22.43                |                    | ✓                  | ✓                   |

**Table S6** – Number of compounds detected in the particulate matter samples in negative and positive ionization mode.

| <i>Winter</i> | Number of detected compounds |                          |                          |       |
|---------------|------------------------------|--------------------------|--------------------------|-------|
|               | Sample number                | Negative ionization mode | Positive ionization mode | Total |
|               | 94                           | 4118                     | 4154                     | 7852  |
|               | 96                           | 4887                     | 4768                     | 7157  |
|               | 98                           | 3508                     | 3649                     | 9655  |
|               | 100                          | 3939                     | 3913                     | 8272  |
| <i>Summer</i> | 261                          | 1887                     | 1390                     | 3277  |
|               | 264                          | 4947                     | 4331                     | 9278  |
|               | 271                          | 2453                     | 1949                     | 4402  |
|               | 274                          | 4415                     | 4281                     | 8696  |

Sample numbers correspond to Table S2.

**Table S7** – Concentrations (in air) of the quantified compounds in the PM<sub>2.5</sub> samples collected in the summer season.

| Compound                                                            | MW     | MF                                                          | Retention time (tr) | Molecular species  | Sample 261 (ng/m <sup>3</sup> ) | Sample 264 (ng/m <sup>3</sup> ) | Sample 271 (ng/m <sup>3</sup> ) | Sample 274 (ng/m <sup>3</sup> ) |
|---------------------------------------------------------------------|--------|-------------------------------------------------------------|---------------------|--------------------|---------------------------------|---------------------------------|---------------------------------|---------------------------------|
| propanedioic acid                                                   | 104.06 | C <sub>3</sub> H <sub>4</sub> O <sub>4</sub>                | 0.83                | (M-H) <sup>-</sup> | -                               | 24.89                           | -                               | -                               |
| (Z)-but-2-enedioic acid                                             | 116.07 | C <sub>4</sub> H <sub>4</sub> O <sub>4</sub>                | 0.86                | (M-H) <sup>-</sup> | 24.53                           | 4.92                            | 48.29                           | 2.18                            |
| butanedioic acid                                                    | 118.09 | C <sub>4</sub> H <sub>6</sub> O <sub>4</sub>                | 0.97                | (M-H) <sup>-</sup> | 28.80                           | 8.00                            | 44.53                           | 2.70                            |
| (Z)-2-methylbut-2-enedioic acid                                     | 130.1  | C <sub>5</sub> H <sub>6</sub> O <sub>4</sub>                | 1.22                | (M-H) <sup>-</sup> | 20.98                           | 3.37                            | 43.10                           | 1.88                            |
| 4-oxopentanoic acid                                                 | 116.12 | C <sub>5</sub> H <sub>8</sub> O <sub>3</sub>                | 1.27                | (M-H) <sup>-</sup> | 168.57                          | **                              | 352.07                          | -                               |
| pentanedioic acid                                                   | 132.11 | C <sub>5</sub> H <sub>8</sub> O <sub>4</sub>                | 1.33                | (M-H) <sup>-</sup> | 9.51                            | 3.18                            | 17.57                           | 1.65                            |
| 2-hydroxy-3-methylbutanoic acid                                     | 118.13 | C <sub>5</sub> H <sub>10</sub> O <sub>3</sub>               | 2.39                | (M-H) <sup>-</sup> | -                               | 0.15                            | *                               | 0.05                            |
| hexanedioic acid                                                    | 146.14 | C <sub>6</sub> H <sub>10</sub> O <sub>4</sub>               | 2.3                 | (M-H) <sup>-</sup> | 5.22                            | 3.86                            | 10.53                           | 2.28                            |
| 2-formylbenzoic acid                                                | 150.13 | C <sub>8</sub> H <sub>6</sub> O <sub>3</sub>                | 3.75                | (M-H) <sup>-</sup> | 21.40                           | 2.17                            | 29.35                           | 0.56                            |
| 1,2-benzenedioic acid                                               | 166.13 | C <sub>8</sub> H <sub>6</sub> O <sub>4</sub>                | 3.55                | (M-H) <sup>-</sup> | 61.46                           | 20.47                           | 83.30                           | 17.50                           |
| 4-nitrobenzene-1,2-diol                                             | 155.11 | C <sub>6</sub> H <sub>5</sub> NO <sub>4</sub>               | 4.44                | (M-H) <sup>-</sup> | *                               | 1.50                            | *                               | 0.69                            |
| heptanedioic acid                                                   | 160.17 | C <sub>7</sub> H <sub>12</sub> O <sub>4</sub>               | 4.55                | (M-H) <sup>-</sup> | 30.05                           | 0.60                            | 1.87                            | 0.96                            |
| 2-hydroxyhexanoic acid                                              | 132.16 | C <sub>6</sub> H <sub>12</sub> O <sub>3</sub>               | 5.57                | (M-H) <sup>-</sup> | *                               | 0.02                            | 0.05                            | 0.01                            |
| 4-nitrophenol                                                       | 139.11 | C <sub>6</sub> H <sub>5</sub> NO <sub>3</sub>               | 6.22                | (M-H) <sup>-</sup> | 9.30                            | 1.06                            | 21.25                           | 0.39                            |
| 2-hydroxy-5-nitrobenzoic acid                                       | 183.12 | C <sub>7</sub> H <sub>5</sub> NO <sub>5</sub>               | 6.28                | (M-H) <sup>-</sup> | 0.83                            | **                              | 1.55                            | **                              |
| 2,4-dinitrophenol                                                   | 184.11 | C <sub>6</sub> H <sub>4</sub> N <sub>2</sub> O <sub>5</sub> | 7.39                | (M-H) <sup>-</sup> | 0.51                            | 0.14                            | 0.66                            | 0.02                            |
| octanedioic acid                                                    | 174.19 | C <sub>8</sub> H <sub>14</sub> O <sub>4</sub>               | 7.43                | (M-H) <sup>-</sup> | 0.84                            | 2.87                            | 1.57                            | 1.74                            |
| 2-methoxy-4-nitrophenol                                             | 169.13 | C <sub>7</sub> H <sub>7</sub> NO <sub>4</sub>               | 7.64                | (M-H) <sup>-</sup> | -                               | -                               | *                               | -                               |
| 2-hydroxybenzoic acid                                               | 138.12 | C <sub>7</sub> H <sub>6</sub> O <sub>3</sub>                | 7.52                | (M-H) <sup>-</sup> | 0.00                            | 0.67                            | 1.91                            | 0.23                            |
| 3-methyl-4-nitrophenol                                              | 153.14 | C <sub>7</sub> H <sub>7</sub> NO <sub>3</sub>               | 9.24                | (M-H) <sup>-</sup> | 0.54                            | 0.02                            | 1.33                            | 0.01                            |
| nonanedioic acid                                                    | 188.22 | C <sub>9</sub> H <sub>16</sub> O <sub>4</sub>               | 10.48               | (M-H) <sup>-</sup> | 0.71                            | **                              | 2.30                            | 6.16                            |
| 2-methyl-4-nitrophenol                                              | 153.14 | C <sub>7</sub> H <sub>7</sub> NO <sub>3</sub>               | 10.28               | (M-H) <sup>-</sup> | 3.00                            | 0.08                            | 8.56                            | 0.02                            |
| naphthalene-2,3-dicarboxylic acid                                   | 216.19 | C <sub>12</sub> H <sub>8</sub> O <sub>4</sub>               | 10.84               | (M-H) <sup>-</sup> | -                               | -                               | -                               | 0.02                            |
| 2,6-dimethyl-4-nitrophenol                                          | 167.16 | C <sub>8</sub> H <sub>9</sub> NO <sub>3</sub>               | 12.56               | (M-H) <sup>-</sup> | 0.97                            | 0.04                            | 1.38                            | 0.003                           |
| cis-pinonic acid                                                    | 184.23 | C <sub>10</sub> H <sub>16</sub> O <sub>3</sub>              | 8.27                | (M+H) <sup>+</sup> | *                               | 3.37                            | *                               | 2.82                            |
| dimethyl propanedioate                                              | 132.11 | C <sub>5</sub> H <sub>8</sub> O <sub>4</sub>                | 2.68                | (M+H) <sup>+</sup> | -                               | 0.39                            | -                               | 0.07                            |
| 2,5-dimethylbenzaldehyde                                            | 134.18 | C <sub>9</sub> H <sub>10</sub> O                            | 14.88               | (M+H) <sup>+</sup> | *                               | -                               | *                               | -                               |
| 1,3,5-trimethoxybenzene                                             | 168.19 | C <sub>9</sub> H <sub>12</sub> O <sub>3</sub>               | 13.29               | (M+H) <sup>+</sup> | -                               | 0.03                            | -                               | -                               |
| Number of compounds quantified                                      |        |                                                             |                     |                    | 22                              | 25                              | 24                              | 23                              |
| Total OA mass quantified (µg/m <sup>3</sup> )                       |        |                                                             |                     |                    | 0.39                            | 0.08                            | 0.67                            | 0.04                            |
| Average PM <sub>2.5</sub> mass during sampling (µg/m <sup>3</sup> ) |        |                                                             |                     |                    | 95                              | 83                              | 61                              | 33                              |
| Amount of OA mass quantified (%)                                    |        |                                                             |                     |                    | 0.41                            | 0.10                            | 1.10                            | 0.13                            |

MW = molecular weight. MF = molecular formula. - = Not detected, \* = Below linear calibration range, \*\* = Above linear calibration range.



**Table S8** – Concentrations (in air) of the quantified compounds in the PM<sub>2.5</sub> samples collected in the winter season.

| Compound                                                            | MW     | MF                                                          | Retention time (t <sub>R</sub> ) | Molecular species  | Sample 94 (ng/m <sup>3</sup> ) | Sample 96 (ng/m <sup>3</sup> ) | Sample 98 (ng/m <sup>3</sup> ) | Sample 100 (ng/m <sup>3</sup> ) |
|---------------------------------------------------------------------|--------|-------------------------------------------------------------|----------------------------------|--------------------|--------------------------------|--------------------------------|--------------------------------|---------------------------------|
| (Z)-but-2-enedioic acid                                             | 116.07 | C <sub>4</sub> H <sub>4</sub> O <sub>4</sub>                | 0.86                             | (M-H) <sup>-</sup> | 8.47                           | 2.58                           | 10.37                          | 1.71                            |
| butanedioic acid                                                    | 118.09 | C <sub>4</sub> H <sub>6</sub> O <sub>4</sub>                | 0.97                             | (M-H) <sup>-</sup> | 5.98                           | 2.30                           | 5.01                           | 1.49                            |
| (Z)-2-methylbut-2-enedioic acid                                     | 130.1  | C <sub>5</sub> H <sub>6</sub> O <sub>4</sub>                | 1.22                             | (M-H) <sup>-</sup> | 8.99                           | 3.30                           | 8.91                           | 1.12                            |
| 4-oxopentanoic acid                                                 | 116.12 | C <sub>5</sub> H <sub>8</sub> O <sub>3</sub>                | 1.27                             | (M-H) <sup>-</sup> | 72.22                          | -                              | 51.69                          | 14.58                           |
| 2-hydroxy-3-methylbutanoic acid                                     | 118.13 | C <sub>5</sub> H <sub>10</sub> O <sub>3</sub>               | 2.39                             | (M-H) <sup>-</sup> | 0.20                           | 0.10                           | 0.15                           | 0.06                            |
| hexanedioic acid                                                    | 146.14 | C <sub>6</sub> H <sub>10</sub> O <sub>4</sub>               | 2.30                             | (M-H) <sup>-</sup> | 4.10                           | 1.70                           | 4.64                           | 0.60                            |
| 2,5-dihydroxybenzoic acid                                           | 154.12 | C <sub>7</sub> H <sub>6</sub> O <sub>4</sub>                | 2.90                             | (M-H) <sup>-</sup> | 0.35                           | -                              | 0.38                           | -                               |
| 2-formylbenzoic acid                                                | 150.13 | C <sub>8</sub> H <sub>6</sub> O <sub>3</sub>                | 3.75                             | (M-H) <sup>-</sup> | **                             | **                             | **                             | 2.75                            |
| 1,2-benzenedioic acid                                               | 166.13 | C <sub>8</sub> H <sub>6</sub> O <sub>4</sub>                | 3.55                             | (M-H) <sup>-</sup> | 57.49                          | 22.15                          | 51.31                          | 2.07                            |
| 4-nitrobenzene-1,2-diol                                             | 155.11 | C <sub>6</sub> H <sub>5</sub> NO <sub>4</sub>               | 4.44                             | (M-H) <sup>-</sup> | **                             | **                             | **                             | 0.84                            |
| heptanedioic acid                                                   | 160.17 | C <sub>7</sub> H <sub>12</sub> O <sub>4</sub>               | 4.55                             | (M-H) <sup>-</sup> | 1.52                           | 0.77                           | 1.34                           | 0.23                            |
| 4-methylbenzene-1,2-diol                                            | 124.14 | C <sub>7</sub> H <sub>8</sub> O <sub>2</sub>                | 4.59                             | (M-H) <sup>-</sup> | 0.07                           | 0.27                           | 0.14                           | -                               |
| 3-methylbenzene-1,2-diol                                            | 124.14 | C <sub>7</sub> H <sub>8</sub> O <sub>2</sub>                | 5.06                             | (M-H) <sup>-</sup> | 0.32                           | 0.42                           | 0.09                           | -                               |
| 4-nitrophenol                                                       | 139.11 | C <sub>6</sub> H <sub>5</sub> NO <sub>3</sub>               | 6.22                             | (M-H) <sup>-</sup> | **                             | **                             | 16.66                          | **                              |
| 2-hydroxy-5-nitrobenzoic acid                                       | 183.12 | C <sub>7</sub> H <sub>5</sub> NO <sub>5</sub>               | 6.28                             | (M-H) <sup>-</sup> | 2.85                           | **                             | 2.92                           | 0.10                            |
| 2,4-dinitrophenol                                                   | 184.11 | C <sub>6</sub> H <sub>4</sub> N <sub>2</sub> O <sub>5</sub> | 7.39                             | (M-H) <sup>-</sup> | 5.90                           | **                             | 1.54                           | 0.19                            |
| octanedioic acid                                                    | 174.19 | C <sub>8</sub> H <sub>14</sub> O <sub>4</sub>               | 7.43                             | (M-H) <sup>-</sup> | 2.00                           | 1.12                           | 2.19                           | 0.40                            |
| 2-methoxy-4-nitrophenol                                             | 169.13 | C <sub>7</sub> H <sub>7</sub> NO <sub>4</sub>               | 7.64                             | (M-H) <sup>-</sup> | 3.07                           | -                              | -                              | 0.21                            |
| 2-hydroxybenzoic acid                                               | 138.12 | C <sub>7</sub> H <sub>6</sub> O <sub>3</sub>                | 7.52                             | (M-H) <sup>-</sup> | 8.13                           | **                             | 5.78                           | 0.94                            |
| 3-methyl-4-nitrophenol                                              | 153.14 | C <sub>7</sub> H <sub>7</sub> NO <sub>3</sub>               | 9.24                             | (M-H) <sup>-</sup> | **                             | **                             | **                             | **                              |
| nonanedioic acid                                                    | 188.22 | C <sub>9</sub> H <sub>16</sub> O <sub>4</sub>               | 10.48                            | (M-H) <sup>-</sup> | 8.67                           | 3.44                           | 8.31                           | 2.59                            |
| 2-methyl-4-nitrophenol                                              | 153.14 | C <sub>7</sub> H <sub>7</sub> NO <sub>3</sub>               | 10.28                            | (M-H) <sup>-</sup> | **                             | **                             | 3.14                           | **                              |
| 2,6-dimethyl-4-nitrophenol                                          | 167.16 | C <sub>8</sub> H <sub>9</sub> NO <sub>3</sub>               | 12.56                            | (M-H) <sup>-</sup> | 5.89                           | **                             | 3.87                           | **                              |
| nonanoic acid                                                       | 158.24 | C <sub>9</sub> H <sub>18</sub> O <sub>2</sub>               | 19.31                            | (M-H) <sup>-</sup> | 6.29                           | -                              | *                              | -                               |
| cis-pinonic acid                                                    | 184.23 | C <sub>10</sub> H <sub>16</sub> O <sub>3</sub>              | 8.27                             | (M+H) <sup>+</sup> | *                              | -                              | *                              | *                               |
| 4-methoxybenzoic acid                                               | 152.15 | C <sub>8</sub> H <sub>8</sub> O <sub>3</sub>                | 9.29                             | (M+H) <sup>+</sup> | -                              | -                              | -                              | *                               |
| 2,6-dimethoxyphenol                                                 | 154.16 | C <sub>8</sub> H <sub>10</sub> O <sub>3</sub>               | 7.29                             | (M+H) <sup>+</sup> | -                              | -                              | -                              | -                               |
| Number of detected compounds                                        |        |                                                             |                                  |                    | 25                             | 20                             | 24                             | 22                              |
| Total OA mass quantified (µg/m <sup>3</sup> )                       |        |                                                             |                                  |                    | 0.20                           | 0.04                           | 0.18                           | 0.03                            |
| Average PM <sub>2.5</sub> mass during sampling (µg/m <sup>3</sup> ) |        |                                                             |                                  |                    | 141                            | 111                            | 129                            | 7                               |
| Amount of OA mass quantified (%)                                    |        |                                                             |                                  |                    | 0.14                           | 0.03                           | 0.14                           | 0.42                            |

MW = molecular weight. MF = molecular formula. - = Not detected, \* = Below linear calibration range, \*\* = Above linear calibration range.

**Table S9** – Number of compounds detected in the surface water samples in negative and positive ionization mode.

| Sample ID | Sample description                                             | Number of detected compounds |               |       |
|-----------|----------------------------------------------------------------|------------------------------|---------------|-------|
|           |                                                                | Negative mode                | Positive mode | Total |
| S1        | Colombo (industrial effluent)                                  | 3972                         | 5193          | 9165  |
| S2        | Hong Kong (sewage and building construction influence)         | 434                          | 2387          | 2821  |
| S3        | Colombo, (wastewater treatment effluent)                       | 2447                         | 1483          | 3930  |
| S4        | Guangzhou (pharmaceuticals, agricultural and sewage influence) | 1200                         | 1746          | 2946  |
| S5        | Nagpur (upstream of two major hospitals)                       | 357                          | 1643          | 2000  |
| S6        | Nagpur (downstream of two major hospitals)                     | 2768                         | 3041          | 5809  |
| S7        | Nagpur (downstream of S6, post river Pili confluence)          | 79                           | 1424          | 1503  |

Sample numbers correspond to Table S2.

**Table S10** – Concentrations of the quantified compounds in the surface water samples in  $\mu\text{g L}^{-1}$ .

| Compound                             | MW     | MF                                            | Retention time (tr) | Molecular species   | S1           | S2    | S3           | S4           | S5           | S6    | S7    |
|--------------------------------------|--------|-----------------------------------------------|---------------------|---------------------|--------------|-------|--------------|--------------|--------------|-------|-------|
| hexanedioic acid                     | 146.14 | C <sub>6</sub> H <sub>10</sub> O <sub>4</sub> | 2.3                 | (M-H) <sup>-</sup>  | <sup>a</sup> | -     | <sup>a</sup> | <sup>a</sup> | <sup>a</sup> | -     | -     |
| 4-nitrobenzene-1,2-diol              | 155.11 | C <sub>6</sub> H <sub>5</sub> NO <sub>4</sub> | 4.44                | (M-H) <sup>-</sup>  | -            | -     | -            | 0.71         | -            | -     | -     |
| heptanedioic acid                    | 160.17 | C <sub>7</sub> H <sub>12</sub> O <sub>4</sub> | 4.55                | (M-H) <sup>-</sup>  | -            | -     | -            | <sup>a</sup> | -            | -     | -     |
| 4-nitrophenol                        | 139.11 | C <sub>6</sub> H <sub>5</sub> NO <sub>3</sub> | 6.22                | (M-H) <sup>-</sup>  | 0.26         | -     | 0.08         | 0.15         | *            | *     | *     |
| octanedioic acid                     | 174.19 | C <sub>8</sub> H <sub>14</sub> O <sub>4</sub> | 7.43                | (M-H) <sup>-</sup>  | 0.11         | 0.18  | 0.18         | 0.49         | 0.49         | 0.47  | 0.34  |
| 2-hydroxybenzoic acid                | 138.12 | C <sub>7</sub> H <sub>6</sub> O <sub>3</sub>  | 7.52                | (M-H) <sup>-</sup>  | 0.07         | -     | 0.07         | -            | 0.10         | 0.05  | 0.03  |
| benzoic acid                         | 122.12 | C <sub>7</sub> H <sub>6</sub> O <sub>2</sub>  | 7.93                | (M-H) <sup>-</sup>  | -            | *     | 0.68         | 13.15        | 10.42        | 14.10 | 15.67 |
| 3-methyl-4-nitrophenol               | 153.14 | C <sub>7</sub> H <sub>7</sub> NO <sub>3</sub> | 9.24                | (M-H) <sup>-</sup>  | -            | -     | -            | *            | *            | *     | *     |
| 2-methyl-4-nitrophenol               | 153.14 | C <sub>7</sub> H <sub>7</sub> NO <sub>3</sub> | 10.28               | (M-H) <sup>-</sup>  | *            | -     | -            | 0.07         | *            | *     | *     |
| nonanedioic acid                     | 188.22 | C <sub>9</sub> H <sub>16</sub> O <sub>4</sub> | 10.48               | (M-H) <sup>-</sup>  | 0.16         | 0.70  | 0.39         | 0.56         | 0.66         | 0.60  | 0.36  |
| 2,6-dimethyl-4-nitrophenol           | 167.16 | C <sub>8</sub> H <sub>9</sub> NO <sub>3</sub> | 12.56               | (M-H) <sup>-</sup>  | *            | -     | -            | 0.03         | *            | *     | *     |
| nonanoic acid                        | 158.24 | C <sub>9</sub> H <sub>18</sub> O <sub>2</sub> | 19.31               | (M-H) <sup>-</sup>  | 24.97        | 21.87 | 24.99        | 6.67         | *            | 6.95  | 6.21  |
| (3R)-3,7-dimethyloct-6-enal          | 154.25 | C <sub>10</sub> H <sub>18</sub> O             | 18.89               | (M+H) <sup>+</sup>  | -            | *     | -            | -            | -            | -     | -     |
| 1,2-benzenedioic acid                | 166.13 | C <sub>8</sub> H <sub>6</sub> O <sub>4</sub>  | 3.78                | (M+Na) <sup>+</sup> | -            | -     | -            | -            | <sup>a</sup> | -     | -     |
| Total concentration quantified (ppb) |        |                                               |                     |                     | 25.57        | 22.75 | 26.38        | 21.84        | 11.67        | 22.17 | 22.61 |

MW = molecular weight. MF = molecular formula. - = Not detected, S1 – S7 is the sample identifier, see Table S3.

\* = Below linear calibration range, <sup>a</sup> = Poor chromatographic peak shape prevented quantification.

**Table S11** – Compounds names, source categories and relative sample abundances of the compounds tentatively identified in the surface water samples using the commercial mass spectral library, mzCloud.

| Sample ID | MF                                                              | MW     | t <sub>R</sub> | Name                                 | Category           | mzCloud match (%) | Normalized peak area*   |
|-----------|-----------------------------------------------------------------|--------|----------------|--------------------------------------|--------------------|-------------------|-------------------------|
| S1        | C <sub>7</sub> H <sub>5</sub> NOS                               | 151.0  | 6.4            | 1,2-benzisothiazolin-3-one           | industrial         | 94.0              | 3.06 × 10 <sup>-3</sup> |
|           | C <sub>24</sub> H <sub>30</sub> O <sub>6</sub>                  | 414.2  | 18.7           | bis(4-ethylbenzylidene)sorbitol      | industrial         | 90.7              | 4.32 × 10 <sup>-4</sup> |
|           | C <sub>10</sub> H <sub>13</sub> N <sub>5</sub> O <sub>4</sub>   | 267.1  | 1.1            | adenosine                            | pharmaceuticals    | 95.8              | 5.44 × 10 <sup>-4</sup> |
|           | C <sub>10</sub> H <sub>16</sub> O                               | 152.1  | 19.6           | D-(+)-camphor                        | pharmaceuticals    | 86.8              | 1.94 × 10 <sup>-3</sup> |
|           | C <sub>15</sub> H <sub>23</sub> NO <sub>2</sub>                 | 249.2  | 4.2            | methamphetamine tert-butyl carbamate | pharmaceuticals    | 85.1              | 7.17 × 10 <sup>-4</sup> |
|           | C <sub>13</sub> H <sub>12</sub> N <sub>2</sub> O                | 212.1  | 13.1           | N,N'-diphenylurea                    | human/animal waste | 94.5              | 2.42 × 10 <sup>-3</sup> |
|           | C <sub>9</sub> H <sub>7</sub> NO                                | 145.1  | 8.1            | 2-hydroxyquinoline                   | not assigned       | 88.6              | 9.41 × 10 <sup>-4</sup> |
|           | C <sub>6</sub> H <sub>7</sub> NO                                | 109.1  | 1.0            | 3-hydroxy-2-methylpyridine           | not assigned       | 87.9              | 3.46 × 10 <sup>-4</sup> |
|           | C <sub>20</sub> H <sub>30</sub> O <sub>2</sub>                  | 302.2  | 25.6           | abietic acid                         | not assigned       | 86.7              | 2.04 × 10 <sup>-4</sup> |
|           | C <sub>12</sub> H <sub>17</sub> NO                              | 191.1  | 14.5           | DEET                                 | DEET               | 97.6              | 1.23 × 10 <sup>-1</sup> |
|           | C <sub>8</sub> H <sub>10</sub> N <sub>4</sub> O <sub>2</sub>    | 194.1  | 5.6            | caffeine                             | stimulants         | 93.4              | 6.54 × 10 <sup>-3</sup> |
|           | C <sub>7</sub> H <sub>5</sub> NOS                               | 151.0  | 6.4            | 1,2-benzisothiazolin-3-one           | industrial         | 94.0              | 3.06 × 10 <sup>-3</sup> |
|           | C <sub>24</sub> H <sub>30</sub> O <sub>6</sub>                  | 414.2  | 18.7           | bis(4-ethylbenzylidene)sorbitol      | industrial         | 90.7              | 4.32 × 10 <sup>-4</sup> |
| S2        | C <sub>24</sub> H <sub>30</sub> O <sub>6</sub>                  | 414.2  | 18.74          | bis(4-ethylbenzylidene)sorbitol      | industrial         | 92.3              | 5.69 × 10 <sup>-3</sup> |
|           | C <sub>12</sub> H <sub>27</sub> O <sub>4</sub> P                | 266.2  | 21.25          | tributyl phosphate                   | industrial         | 91.5              | 2.02 × 10 <sup>-3</sup> |
|           | C <sub>6</sub> H <sub>11</sub> NO                               | 113.1  | 3.67           | caprolactam                          | industrial         | 88.3              | 2.57 × 10 <sup>-3</sup> |
|           | C <sub>14</sub> H <sub>22</sub> N <sub>2</sub> O                | 234.2  | 4.51           | lidocaine                            | pharmaceuticals    | 96.4              | 1.51 × 10 <sup>-3</sup> |
|           | C <sub>21</sub> H <sub>25</sub> ClN <sub>2</sub> O <sub>3</sub> | 388.2  | 15.28          | cetirizine                           | pharmaceuticals    | 92.0              | 9.47 × 10 <sup>-4</sup> |
|           | C <sub>32</sub> H <sub>39</sub> NO <sub>4</sub>                 | 501.3  | 14.67          | fexofenadine                         | pharmaceuticals    | 91.2              | 1.17 × 10 <sup>-3</sup> |
|           | C <sub>17</sub> H <sub>21</sub> NO                              | 255.2  | 11.08          | diphenhydramine                      | pharmaceuticals    | 90.9              | 1.49 × 10 <sup>-3</sup> |
|           | C <sub>15</sub> H <sub>25</sub> NO <sub>3</sub>                 | 267.2  | 7.13           | metoprolol                           | pharmaceuticals    | 90.8              | 6.03 × 10 <sup>-3</sup> |
|           | C <sub>17</sub> H <sub>23</sub> NO                              | 257.2  | 6.67           | levorphanol                          | pharmaceuticals    | 89.8              | 5.34 × 10 <sup>-3</sup> |
|           | C <sub>16</sub> H <sub>25</sub> NO <sub>2</sub>                 | 263.2  | 5.95           | o-desmethylvenlafaxine               | pharmaceuticals    | 88.9              | 2.87 × 10 <sup>-3</sup> |
|           | C <sub>17</sub> H <sub>27</sub> N <sub>3</sub> O <sub>4</sub> S | 369.2  | 5.28           | amisulpride                          | pharmaceuticals    | 88.4              | 2.79 × 10 <sup>-3</sup> |
|           | C <sub>15</sub> H <sub>12</sub> N <sub>2</sub> O                | 236.1  | 13.19          | carbamazepine                        | pharmaceuticals    | 87.6              | 1.79 × 10 <sup>-3</sup> |
|           | C <sub>15</sub> H <sub>23</sub> N <sub>3</sub> O <sub>4</sub> S | 341.1  | 1.92           | sulpiride                            | pharmaceuticals    | 87.2              | 1.13 × 10 <sup>-3</sup> |
|           | C <sub>15</sub> H <sub>21</sub> N <sub>3</sub> O <sub>3</sub> S | 323.1  | 15.35          | gliclazide                           | pharmaceuticals    | 86.7              | 1.56 × 10 <sup>-3</sup> |
|           | C <sub>15</sub> H <sub>15</sub> NO <sub>2</sub>                 | 241.1  | 20.91          | mefenamic acid                       | pharmaceuticals    | 85.6              | 8.28 × 10 <sup>-4</sup> |
|           | C <sub>13</sub> H <sub>10</sub> O <sub>2</sub>                  | 198.1  | 13.26          | 4-hydroxybenzophenone                | industrial         | 91.8              | 7.80 × 10 <sup>-4</sup> |
|           | C <sub>9</sub> H <sub>9</sub> N <sub>3</sub> O <sub>2</sub>     | 191.1  | 3.75           | carbendazim                          | pesticide          | 86.4              | 2.87 × 10 <sup>-3</sup> |
|           | C <sub>12</sub> H <sub>17</sub> NO                              | 191.1  | 14.50          | DEET                                 | DEET               | 92.2              | 1.73 × 10 <sup>-2</sup> |
| S3        | C <sub>24</sub> H <sub>30</sub> O <sub>6</sub>                  | 414.20 | 18.727         | bis(4-ethylbenzylidene)sorbitol      | industrial         | 92.7              | 2.85 × 10 <sup>-3</sup> |
|           | C <sub>10</sub> H <sub>13</sub> N <sub>5</sub> O <sub>4</sub>   | 267.10 | 1.067          | adenosine                            | pharmaceuticals    | 96.1              | 5.34 × 10 <sup>-3</sup> |
|           | C <sub>8</sub> H <sub>9</sub> NO <sub>2</sub>                   | 151.06 | 1.989          | paracetamol                          | pharmaceuticals    | 94.1              | 1.85 × 10 <sup>-2</sup> |
|           | C <sub>32</sub> H <sub>39</sub> NO <sub>4</sub>                 | 501.29 | 14.673         | fexofenadine                         | pharmaceuticals    | 85.7              | 1.37 × 10 <sup>-3</sup> |
|           | C <sub>5</sub> H <sub>13</sub> NO                               | 103.10 | 0.723          | choline                              | not assigned       | 95.9              | 1.27 × 10 <sup>-2</sup> |
|           | C <sub>5</sub> H <sub>7</sub> NO <sub>3</sub>                   | 129.04 | 0.909          | L-pyroglutamic acid                  | not assigned       | 89.7              | 2.32 × 10 <sup>-3</sup> |
|           | C <sub>12</sub> H <sub>17</sub> NO                              | 191.13 | 14.504         | DEET                                 | DEET               | 91.5              | 1.17 × 10 <sup>-1</sup> |
|           | C <sub>8</sub> H <sub>10</sub> N <sub>4</sub> O <sub>2</sub>    | 194.08 | 5.592          | caffeine                             | stimulants         | 88.9              | 1.93 × 10 <sup>-2</sup> |

**Table S11** (continued) - Compounds names, source categories and relative sample abundances of the compounds tentatively identified in the surface water samples using the commercial mass spectral library, mzCloud.

| Sample ID | MF                                                              | MW     | t <sub>R</sub> | Name                                     | Category           | mzCloud match (%) | Normalized peak area <sup>a</sup> |
|-----------|-----------------------------------------------------------------|--------|----------------|------------------------------------------|--------------------|-------------------|-----------------------------------|
| S4        | C <sub>24</sub> H <sub>30</sub> O <sub>6</sub>                  | 414.2  | 18.74          | bis(4-ethylbenzylidene)sorbitol          | industrial         | 92.5              | 2.64×10 <sup>-3</sup>             |
|           | C <sub>12</sub> H <sub>27</sub> O <sub>4</sub> P                | 266.2  | 21.26          | tributyl phosphate                       | industrial         | 89.7              | 3.74×10 <sup>-3</sup>             |
|           | C18H15OP                                                        | 278.1  | 16.74          | triphenylphosphine oxide                 | industrial         | 89.1              | 7.44×10 <sup>-3</sup>             |
|           | C <sub>6</sub> H <sub>11</sub> NO                               | 113.1  | 3.68           | caprolactam                              | industrial         | 89.0              | 5.47×10 <sup>-3</sup>             |
|           | C <sub>11</sub> H <sub>15</sub> NO <sub>2</sub>                 | 193.1  | 7.04           | 1,3-benzodioxolylbutanamine (BDB)        | pharmaceuticals    | 85.0              | 2.18×10 <sup>-3</sup>             |
| S5        | C <sub>24</sub> H <sub>30</sub> O <sub>6</sub>                  | 414.20 | 18.739         | bis(4-ethylbenzylidene)sorbitol          | industrial         | 92.3              | 2.25×10 <sup>-3</sup>             |
|           | C <sub>6</sub> H <sub>11</sub> NO                               | 113.08 | 3.7            | caprolactam                              | industrial         | 86.4              | 2.70×10 <sup>-3</sup>             |
|           | C <sub>10</sub> H <sub>13</sub> N <sub>5</sub> O <sub>4</sub>   | 267.10 | 1.048          | adenosine                                | pharmaceuticals    | 96.1              | 1.11×10 <sup>-2</sup>             |
|           | C <sub>4</sub> H <sub>7</sub> N <sub>3</sub> O                  | 113.06 | 0.844          | creatinine                               | human/animal waste | 91.1              | 1.14×10 <sup>-2</sup>             |
|           | C <sub>17</sub> H <sub>19</sub> NO <sub>3</sub>                 | 285.14 | 18.308         | piperine <sup>†</sup>                    | not assigned       | 88.3              | 2.94×10 <sup>-3</sup>             |
|           | C <sub>17</sub> H <sub>19</sub> NO <sub>3</sub>                 | 285.14 | 18.433         | piperine <sup>†</sup>                    | not assigned       | 88.3              | 3.90×10 <sup>-3</sup>             |
|           | C <sub>14</sub> H <sub>32</sub> N <sub>2</sub> O <sub>4</sub>   | 292.24 | 0.943          | tetrakis(2-hydroxypropyl)ethylenediamine | not assigned       | 88.2              | 2.03×10 <sup>-3</sup>             |
|           | C <sub>17</sub> H <sub>19</sub> NO <sub>3</sub>                 | 285.14 | 18.682         | piperine <sup>a</sup>                    | not assigned       | 87.3              | 3.22×10 <sup>-3</sup>             |
|           | C <sub>9</sub> H <sub>11</sub> NO <sub>2</sub>                  | 165.08 | 1.525          | L-phenylalanine                          | pharmaceuticals    | 89.3              | 7.42×10 <sup>-3</sup>             |
|           | C <sub>7</sub> H <sub>8</sub> N <sub>4</sub> O <sub>2</sub>     | 180.06 | 3.441          | paraxanthine                             | stimulants         | 90.0              | 4.95×10 <sup>-3</sup>             |
|           | C <sub>8</sub> H <sub>10</sub> N <sub>4</sub> O <sub>2</sub>    | 194.08 | 5.6            | caffeine                                 | stimulants         | 89.4              | 1.01×10 <sup>-2</sup>             |
|           | C <sub>6</sub> H <sub>5</sub> NO <sub>2</sub>                   | 123.03 | 0.983          | nicotinic acid                           | tobacco            | 85.5              | 3.53×10 <sup>-3</sup>             |
| S6        | C <sub>20</sub> H <sub>30</sub> O <sub>2</sub>                  | 302.2  | 21.01          | eicosapentaenoic acid <sup>†</sup>       | fatty acid         | 92.8              | 1.80×10 <sup>-3</sup>             |
|           | C <sub>20</sub> H <sub>30</sub> O <sub>2</sub>                  | 302.2  | 21.14          | eicosapentaenoic acid <sup>†</sup>       | fatty acid         | 92.2              | 1.75×10 <sup>-3</sup>             |
|           | C <sub>18</sub> H <sub>30</sub> O <sub>2</sub>                  | 278.2  | 23.22          | α-linolenic acid                         | fatty acid         | 92.0              | 1.96×10 <sup>-3</sup>             |
|           | C <sub>20</sub> H <sub>30</sub> O <sub>2</sub>                  | 302.2  | 25.63          | eicosapentaenoic acid <sup>†</sup>       | fatty acid         | 90.4              | 1.17×10 <sup>-3</sup>             |
|           | C <sub>12</sub> H <sub>18</sub> O <sub>3</sub>                  | 210.1  | 7.30           | jasmonic acid                            | plant hormones     | 89.5              | 3.75×10 <sup>-4</sup>             |
|           | C <sub>24</sub> H <sub>30</sub> O <sub>6</sub>                  | 414.2  | 18.74          | bis(4-ethylbenzylidene)sorbitol          | industrial         | 92.2              | 1.76×10 <sup>-3</sup>             |
|           | C <sub>16</sub> H <sub>22</sub> O <sub>4</sub>                  | 278.2  | 21.19          | dibutyl phthalate                        | industrial         | 89.6              | 5.45×10 <sup>-3</sup>             |
|           | C <sub>6</sub> H <sub>11</sub> NO                               | 113.1  | 3.68           | caprolactam                              | industrial         | 86.1              | 2.52×10 <sup>-3</sup>             |
|           | C <sub>16</sub> H <sub>13</sub> N <sub>3</sub> O <sub>3</sub>   | 295.1  | 13.54          | mebendazole                              | pharmaceuticals    | 88.8              | 6.53×10 <sup>-4</sup>             |
|           | C <sub>10</sub> H <sub>13</sub> N <sub>5</sub> O <sub>4</sub>   | 267.1  | 1.07           | adenosine                                | pharmaceuticals    | 97.3              | 5.88×10 <sup>-3</sup>             |
|           | C <sub>8</sub> H <sub>9</sub> NO <sub>2</sub>                   | 151.1  | 2.00           | paracetamol <sup>†</sup>                 | pharmaceuticals    | 94.2              | 2.23×10 <sup>-2</sup>             |
|           | C <sub>8</sub> H <sub>9</sub> NO <sub>2</sub>                   | 151.1  | 1.88           | paracetamol <sup>†</sup>                 | pharmaceuticals    | 94.1              | 8.08×10 <sup>-3</sup>             |
|           | C <sub>21</sub> H <sub>25</sub> ClN <sub>2</sub> O <sub>3</sub> | 388.2  | 15.31          | cetirizine                               | pharmaceuticals    | 92.4              | 7.07×10 <sup>-4</sup>             |
|           | C <sub>32</sub> H <sub>39</sub> NO <sub>4</sub>                 | 501.3  | 14.71          | fexofenadine                             | pharmaceuticals    | 90.8              | 8.74×10 <sup>-4</sup>             |
|           | C <sub>12</sub> H <sub>15</sub> N <sub>3</sub> O <sub>2</sub> S | 265.1  | 13.46          | albendazole                              | pharmaceuticals    | 88.4              | 3.79×10 <sup>-4</sup>             |
|           | C <sub>6</sub> H <sub>9</sub> NOS                               | 143.0  | 1.65           | 4-methyl-5-thiazoleethanol               | pharmaceuticals    | 88.3              | 7.72×10 <sup>-4</sup>             |
|           | C <sub>13</sub> H <sub>12</sub> F <sub>2</sub> N <sub>6</sub> O | 306.1  | 7.65           | fluconazole                              | pharmaceuticals    | 88.3              | 6.78×10 <sup>-4</sup>             |
|           | C <sub>10</sub> H <sub>10</sub> O <sub>3</sub>                  | 178.1  | 25.38          | 4-methoxycinnamic acid                   | pharmaceuticals    | 85.8              | 1.48×10 <sup>-3</sup>             |
|           | C <sub>17</sub> H <sub>23</sub> NO                              | 257.2  | 6.67           | dextrorphan                              | pharmaceuticals    | 85.4              | 6.96×10 <sup>-4</sup>             |
|           | C <sub>9</sub> H <sub>11</sub> NO <sub>2</sub>                  | 165.1  | 1.51           | L-phenylalanine <sup>†</sup>             | pharmaceuticals    | 88.6              | 3.69×10 <sup>-3</sup>             |
|           | C <sub>9</sub> H <sub>11</sub> NO <sub>2</sub>                  | 165.1  | 1.42           | L-phenylalanine <sup>†</sup>             | pharmaceuticals    | 85.4              | 4.68×10 <sup>-4</sup>             |
|           | C <sub>14</sub> H <sub>22</sub> N <sub>2</sub> O <sub>3</sub>   | 266.2  | 1.92           | atenolol                                 | pharmaceuticals    | 85.0              | 2.55×10 <sup>-3</sup>             |

**Table S11** (continued) - Compounds names, source categories and relative sample abundances of the compounds identified in the surface water samples using the commercial mass spectral library, mzCloud.

| Sample ID | MF                                                            | MW     | t <sub>R</sub> | Name                            | Category           | mzCloud match (%) | Normalized peak area <sup>*</sup> |
|-----------|---------------------------------------------------------------|--------|----------------|---------------------------------|--------------------|-------------------|-----------------------------------|
| S6        | C <sub>8</sub> H <sub>10</sub> N <sub>4</sub> O <sub>2</sub>  | 194.1  | 5.61           | caffeine                        | stimulants         | 93.6              | 1.78×10 <sup>-2</sup>             |
|           | C <sub>7</sub> H <sub>8</sub> N <sub>4</sub> O <sub>2</sub>   | 180.1  | 3.46           | paraxanthine                    | stimulants         | 92.8              | 8.18×10 <sup>-3</sup>             |
|           | C <sub>6</sub> H <sub>6</sub> N <sub>4</sub> O <sub>2</sub>   | 166.0  | 1.64           | 1-methylxanthine <sup>†</sup>   | stimulants         | 86.0              | 1.06×10 <sup>-3</sup>             |
|           | C <sub>6</sub> H <sub>6</sub> N <sub>4</sub> O <sub>2</sub>   | 166.0  | 1.78           | 1-methylxanthine <sup>†</sup>   | stimulants         | 86.0              | 2.43×10 <sup>-3</sup>             |
|           | C <sub>10</sub> H <sub>12</sub> N <sub>2</sub> O              | 176.1  | 1.14           | cotinine                        | tobacco            | 91.0              | 7.97×10 <sup>-3</sup>             |
| S7        | C <sub>24</sub> H <sub>30</sub> O <sub>6</sub>                | 414.20 | 18.73          | bis(4-ethylbenzylidene)sorbitol | industrial         | 92.1              | 3.42×10 <sup>-3</sup>             |
|           | C <sub>10</sub> H <sub>13</sub> N <sub>5</sub> O <sub>4</sub> | 267.10 | 1.058          | adenosine                       | pharmaceuticals    | 97.4              | 2.61×10 <sup>-2</sup>             |
|           | C <sub>17</sub> H <sub>21</sub> NO <sub>3</sub>               | 287.15 | 17.93          | piperanine                      | pharmaceuticals    | 86.4              | 5.02×10 <sup>-4</sup>             |
|           | C <sub>4</sub> H <sub>7</sub> N <sub>3</sub> O                | 113.06 | 0.754          | creatinine                      | human/animal waste | 97.4              | 2.32×10 <sup>-2</sup>             |
|           | C <sub>4</sub> H <sub>7</sub> N <sub>3</sub> O                | 113.06 | 0.914          | creatinine                      | human/animal waste | 93.4              | 1.01×10 <sup>-2</sup>             |
|           | C <sub>17</sub> H <sub>19</sub> NO <sub>3</sub>               | 285.14 | 18.305         | piperine <sup>a</sup>           | not assigned       | 88.6              | 2.56×10 <sup>-3</sup>             |
|           | C <sub>17</sub> H <sub>19</sub> NO <sub>3</sub>               | 285.14 | 18.428         | piperine <sup>a</sup>           | not assigned       | 88.4              | 3.99×10 <sup>-3</sup>             |
|           | C <sub>17</sub> H <sub>19</sub> NO <sub>3</sub>               | 285.14 | 18.677         | piperine <sup>a</sup>           | not assigned       | 86.9              | 3.99×10 <sup>-3</sup>             |
|           | C <sub>9</sub> H <sub>11</sub> NO <sub>2</sub>                | 165.08 | 1.492          | L-phenylalanine                 | pharmaceuticals    | 90.4              | 1.15×10 <sup>-2</sup>             |
|           | C <sub>11</sub> H <sub>9</sub> NO <sub>2</sub>                | 187.06 | 2.525          | indole-3-acrylic acid           | plant hormones     | 87.1              | 2.67×10 <sup>-3</sup>             |
|           | C <sub>8</sub> H <sub>10</sub> N <sub>4</sub> O <sub>2</sub>  | 194.08 | 5.606          | caffeine                        | stimulants         | 88.7              | 8.01×10 <sup>-3</sup>             |
|           | C <sub>7</sub> H <sub>8</sub> N <sub>4</sub> O <sub>2</sub>   | 180.06 | 3.463          | paraxanthine                    | stimulants         | 87.9              | 2.98×10 <sup>-3</sup>             |
|           | C <sub>6</sub> H <sub>5</sub> NO <sub>2</sub>                 | 123.03 | 0.911          | nicotinic acid                  | tobacco            | 89.6              | 4.44×10 <sup>-3</sup>             |

MF = molecular formula. MW = Molecular weight. t<sub>R</sub> = retention time. <sup>\*</sup> = Relative sample peak area. <sup>†</sup> = Suspected structural isomers of duplicate compound.

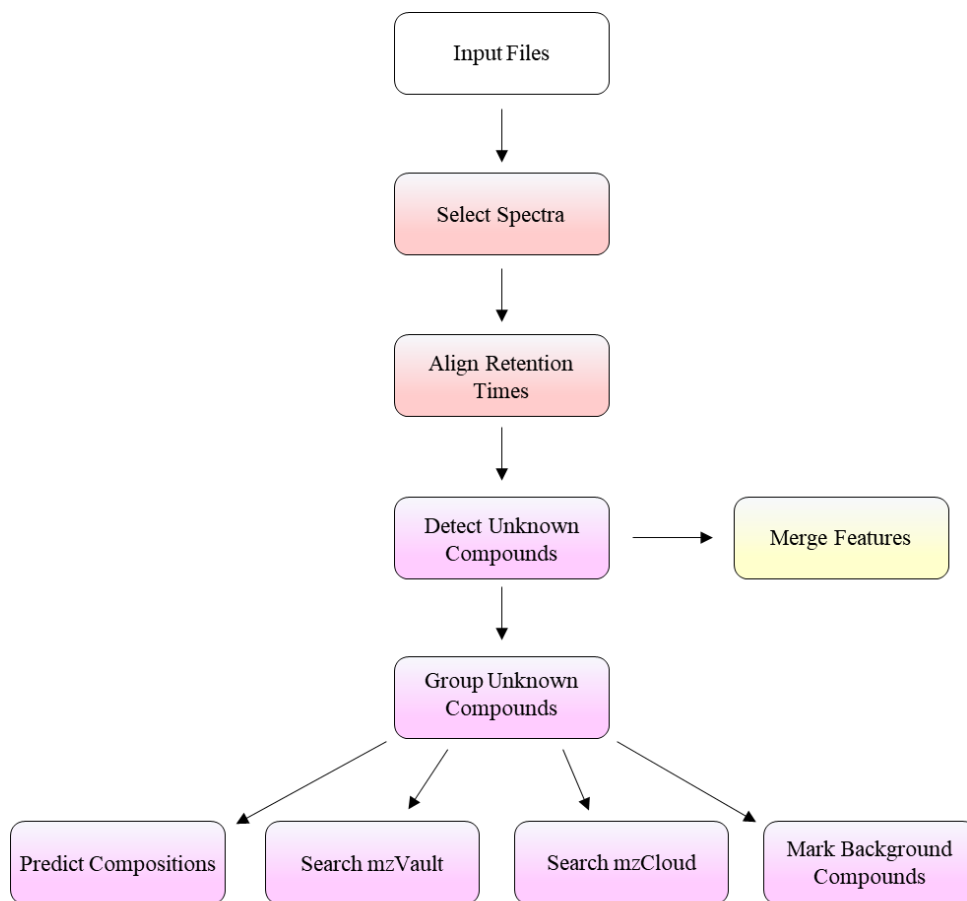


---

Post-Processing Nodes

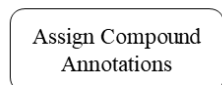

**Figure S1** – A schematic of the bespoke non-targeted workflow developed in Compound Discoverer. Coloring corresponds to the node groupings presented in the software.

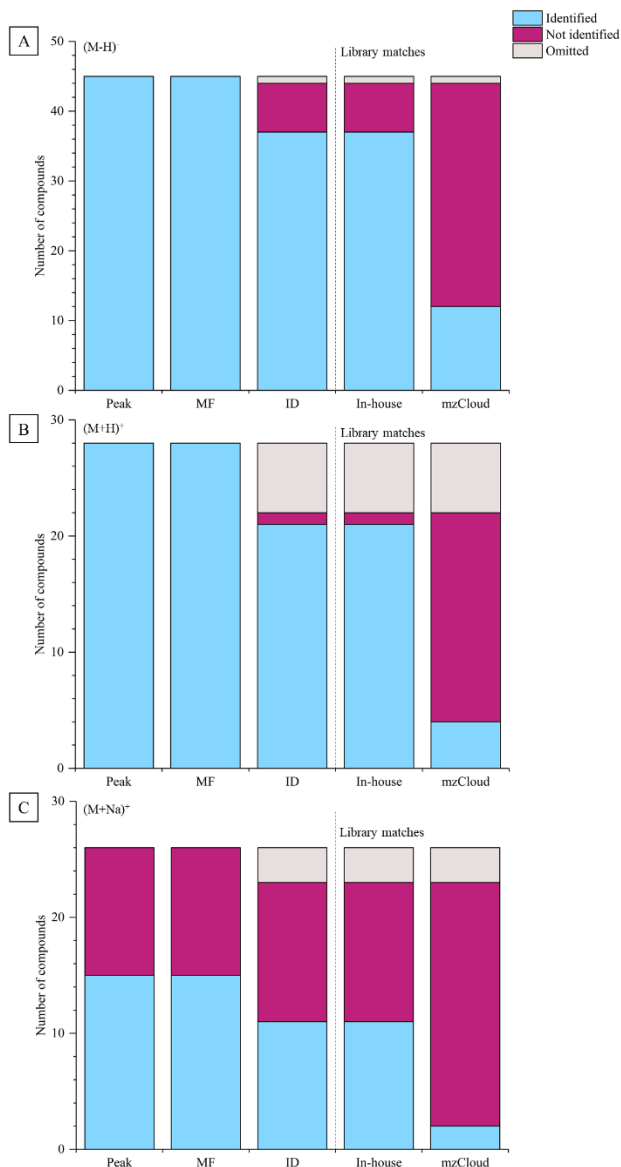

**Figure S2** – Performance of the non-targeted method to detect and identify 60 individually prepared standards at a concentration of 1 ppm (see manuscript section ‘Initial Software Testing’ for further information). Each plot displays whether the chromatographic peak (Peak), molecular formulae (MF) and compound name (ID) were correctly identified by the non-targeted method for  $[M-H]^-$  (A),  $[M+H]^+$  (B) and  $[M+Na]^+$  (C). A correct identification was reported if the non-targeted method reported the same result as manual data processing. Compound names were assigned using the in-house or commercial (mzCloud) MS<sup>2</sup> library. The number of compounds identified using each MS<sup>2</sup> library is shown (‘library matches’). Omitted data = no MS<sup>2</sup> data recorded during analysis, preventing molecular identification.



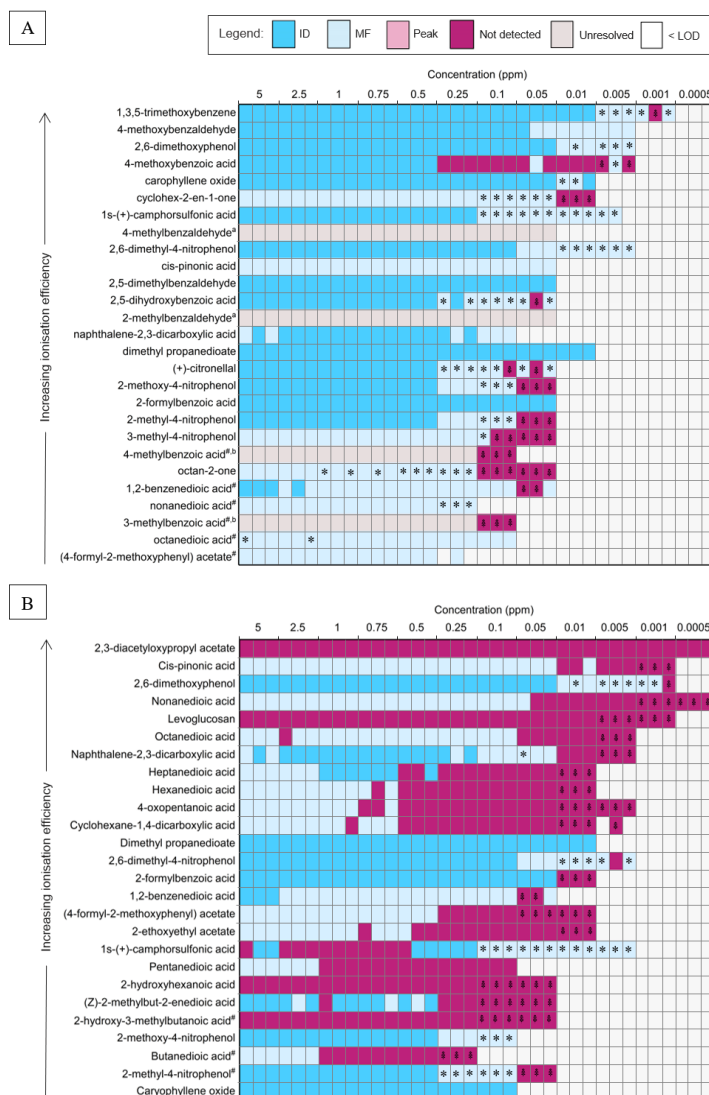

**Figure S3** – Performance of the non-targeted method to detect and identify (A)  $[M+H]^+$  and (B)  $[M+Na]^+$  in the standard mix at various concentrations. Plot displays whether the compound names (ID), molecular formulae (MF) and chromatographic peak (Peak) were identified. Each box represents one measurement, with 3 replicate sample injection measurements and data analyses performed for each concentration. \* = No MS<sup>2</sup> data acquired during analysis preventing molecular identification. ‡ = Chromatographic peak cannot be detected due to the use of unit or near unit mass resolution. Isomeric species which could not be resolved *via* manual or automated data processing are shown in grey. Letters correspond to the groups of isomeric species which could not be resolved; <sup>a</sup> = 2-methylbenzaldehyde and 4-methylbenzaldehyde. <sup>b</sup> = 3-methylbenzoic acid and 4-methylbenzoic acid. <sup>#</sup> = In-house library contains no MS<sup>2</sup> spectra for this standard.

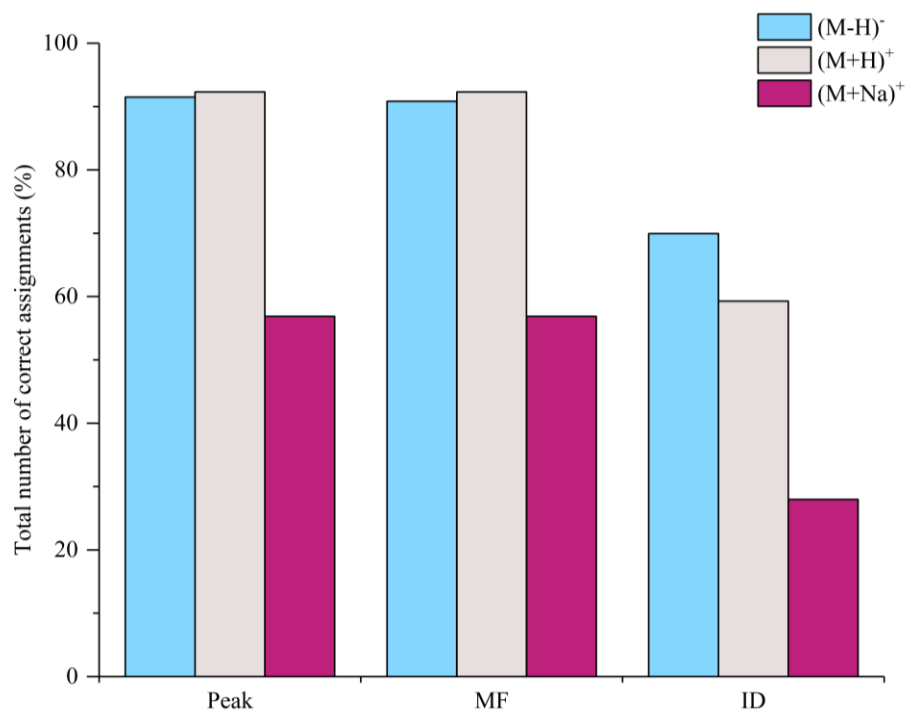

**Figure S4** – Performance of the non-targeted screening method to correctly identify the chromatographic peak (‘Peak’), molecular formula (‘MF’) and chemical identity (‘ID’) of each molecular species in the standard mixtures at concentrations ranging from 5 ppm to 0.05 ppb. Plot provides the total number of correct assignments (in percentage) observed in Figures 1 and S3.

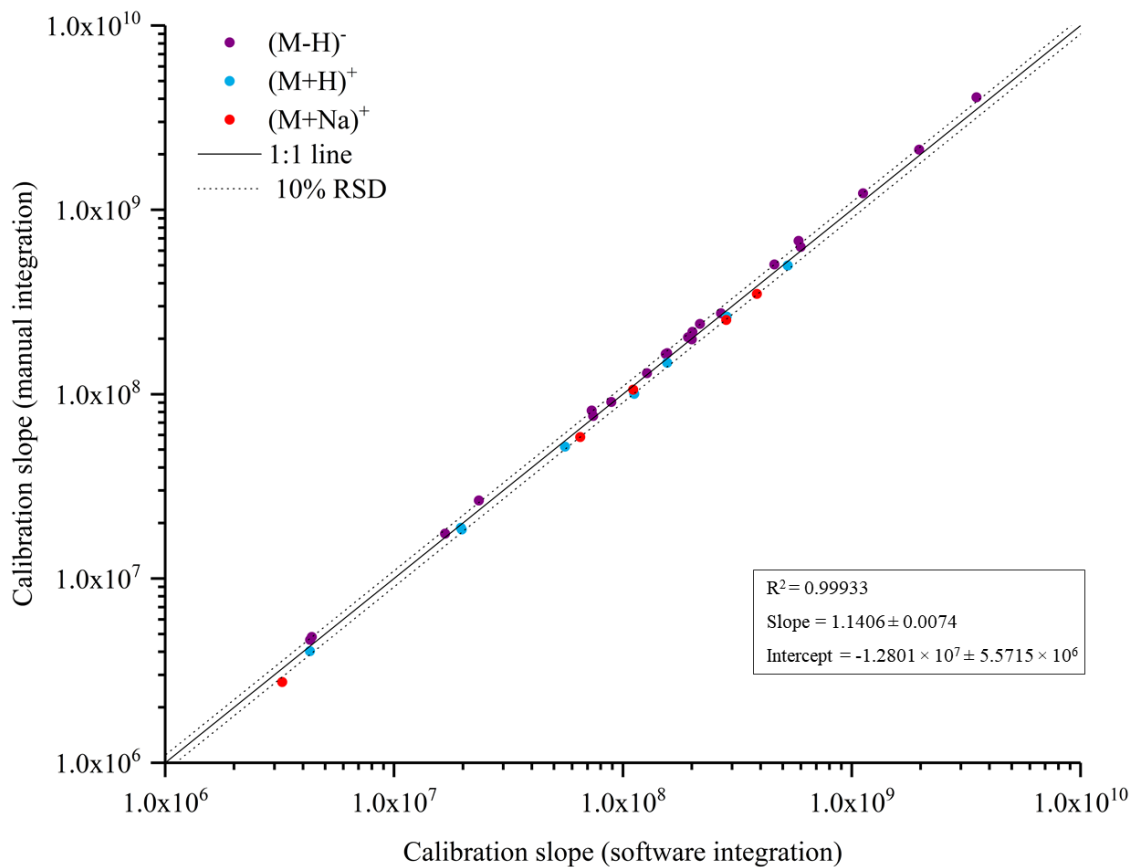

**Figure S5** – Performance of non-targeted method vs. manual analysis for chromatographic peak integration. Plot shows the calibration slope of a detected molecular species integrated manually (‘manual integration’), divided by the calibration slope of the same molecular species integrated using the non-targeted method (‘software integration’). Each calibration graph consisted of a minimum of 5 concentrations and 3 replicate measurements per concentration.

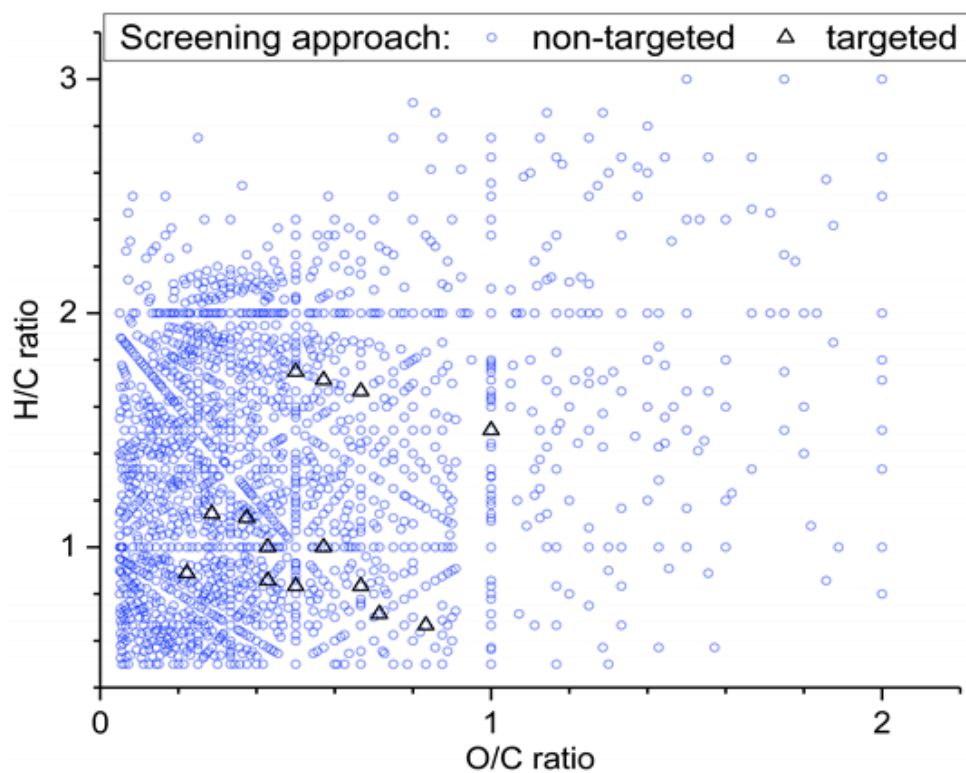

**Figure S6** - A comparison of the number of compounds detected in one PM sample (sample 96, see Table S2) using the targeted and non-targeted screening approach in negative ionisation mode, shown in a chemical space. Each symbol corresponds to one molecular formula, representing in some cases, multiple compounds (isomers). 60 environmental compounds were targeted, only 20 were detected (see Table S1 for the targeted compounds). In contrast, the non-targeted screening approach detected 5089 unique compounds (*i.e.* chemically and/or structurally different).

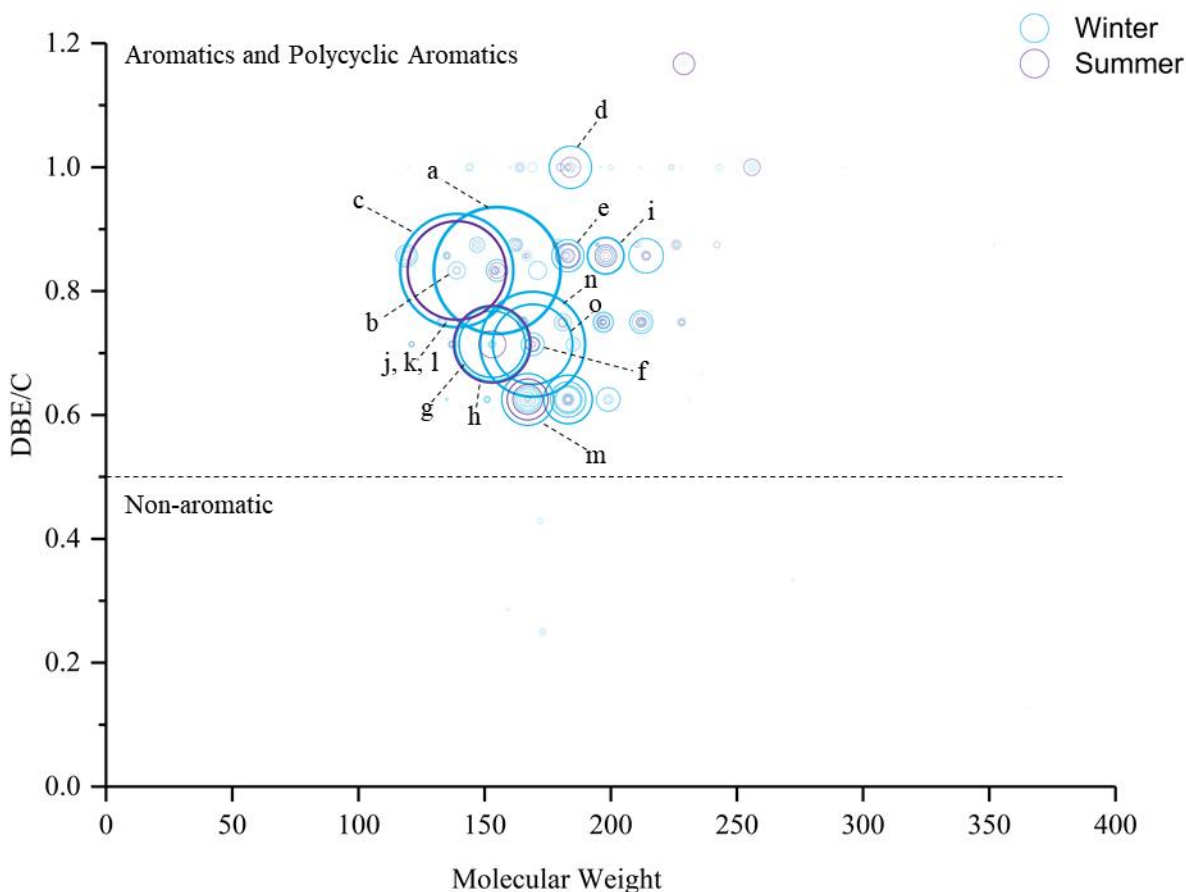

**Figure S7** – Comparison of CHON C<sub>6</sub> to C<sub>8</sub> containing species in the winter (sample = 94, see Table S2) and summer (sample = 261) PM<sub>2.5</sub> samples. Each bubble represents one compound, and the size of the bubble displays the normalized sample peak area of the compound in each sample. Letters correspond to molecular identifications using the tandem mass spectral libraries; a = 4-nitrobenzene-1,2-diol, b = 3-nitrophenol, c = 4-nitrophenol, d = 2,4-dinitrophenol, e = 2-hydroxy-5-nitrobenzoic acid, f = 4-nitroguaiacol, g = 3-methyl-4-nitrophenol, h = 2-methyl-4-nitrophenol, i = 3,5-dinitro-*o*-cresol, j = 5-hydroxyindole, k = isomer of 5-hydroxyindole, l = isomer of 5-hydroxyindole and, m = 2,6-dimethyl-4-nitrophenol. Letters n and o display the suspected methyl nitrocatechols at  $t_R$  8.82 and 7.15, respectively.

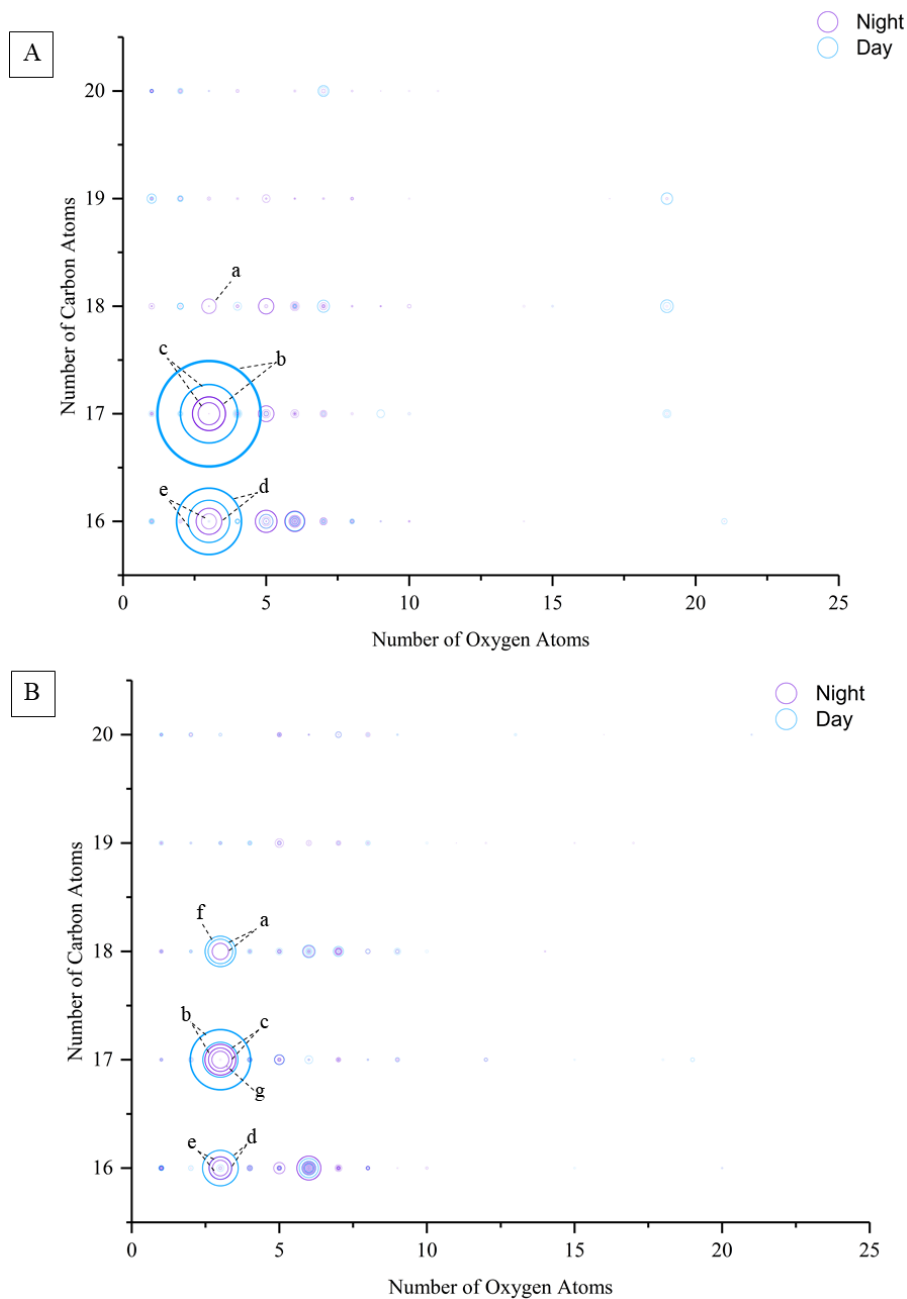

**Figure S8** – Comparison of the C<sub>16</sub> to C<sub>20</sub> CHOS species in the PM<sub>2.5</sub> samples collected in the summer (A) and winter (B) seasons. Each circle represents one compound and the size of the circle represent the normalized sample peak area. Figure A displays samples 261 (daytime) and 264 (nighttime), see SI Table S2. Figure B displays samples 94 (daytime) and 96 (nighttime). a = 4-dodecylbenzenesulfonic acid, b = C<sub>17</sub>H<sub>28</sub>O<sub>3</sub>S tr 22.37, c = C<sub>17</sub>H<sub>28</sub>O<sub>3</sub>S tr 22.68, d = C<sub>16</sub>H<sub>26</sub>O<sub>3</sub>S tr 21.25, e = C<sub>16</sub>H<sub>26</sub>O<sub>3</sub>S tr 21.53, f = C<sub>18</sub>H<sub>30</sub>O<sub>3</sub>S, tr 23.73 (suspected 4-dodecylbenzenesulfonic acid structural isomer) and g = C<sub>17</sub>H<sub>28</sub>O<sub>3</sub>S tr 22.49.



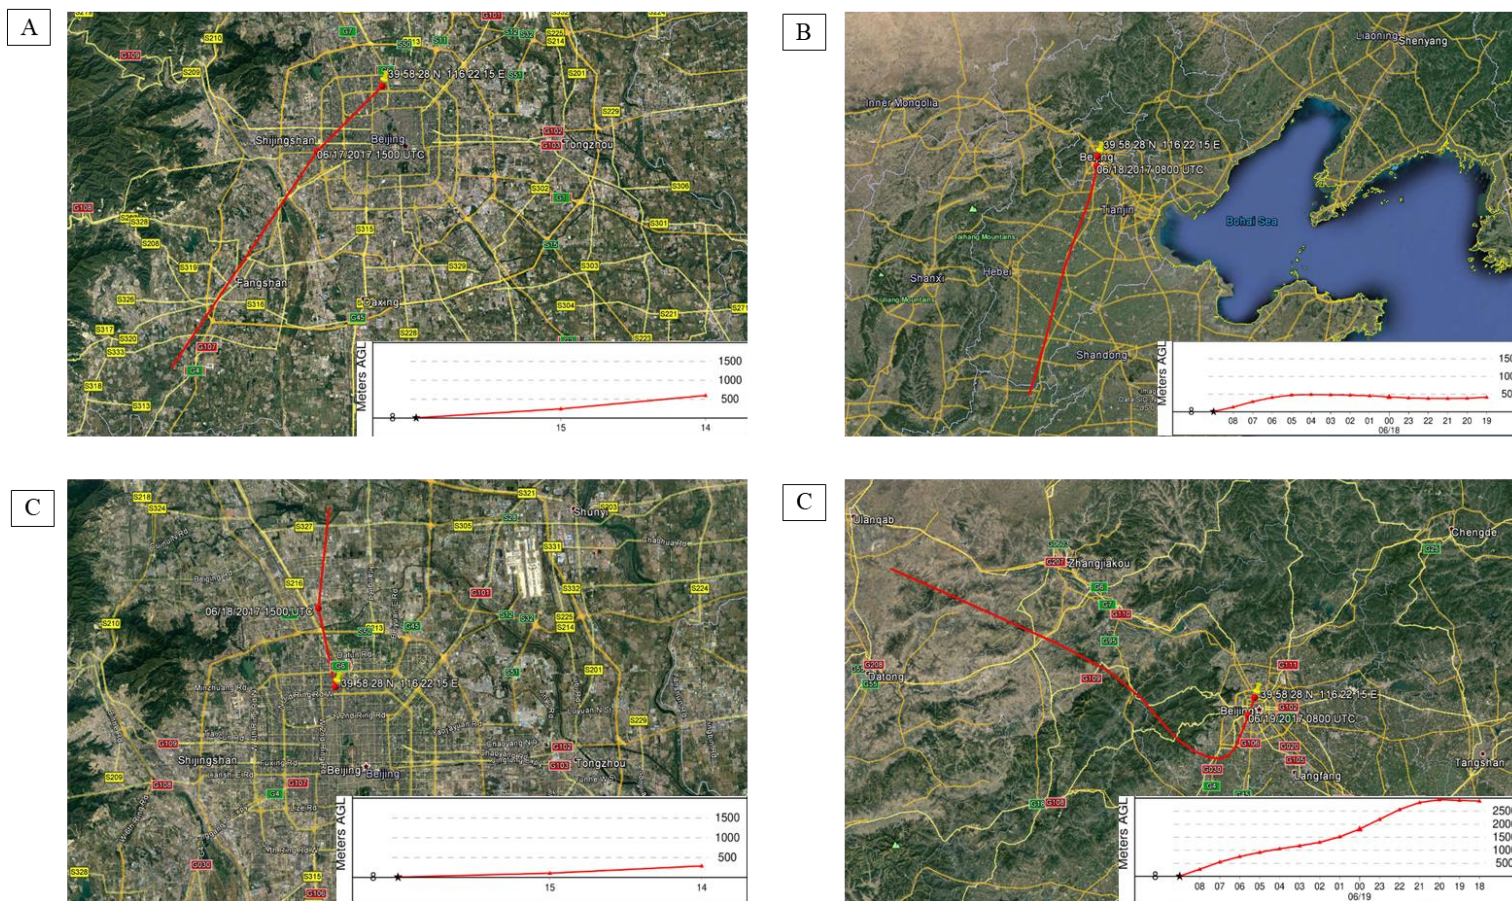

**Figure S9** – Back-trajectory modelled data showing the transport of the sampled air masses during the summer season for (A) sample 261 (17/06/17, day), (B) sample 264 (17/06/17, night), (C) sample 271 (18/06/17, day) and (D) sample 274 (18/06/17, night). The sampling site is shown by the yellow pin. The red line on the map shows the air mass transport. The Figure in the bottom right corner shows the height of the air mass transport (y-axis, meters) vs. the sampling date and time (hours). An 8 meter height was set at the sampling location corresponding to the sampler height (see Materials and Methods). Data was calculated using the HYSPLIT trajectory model provided by NOAA ([https://ready.arl.noaa.gov/HYSPLIT\\_traj.php](https://ready.arl.noaa.gov/HYSPLIT_traj.php)).

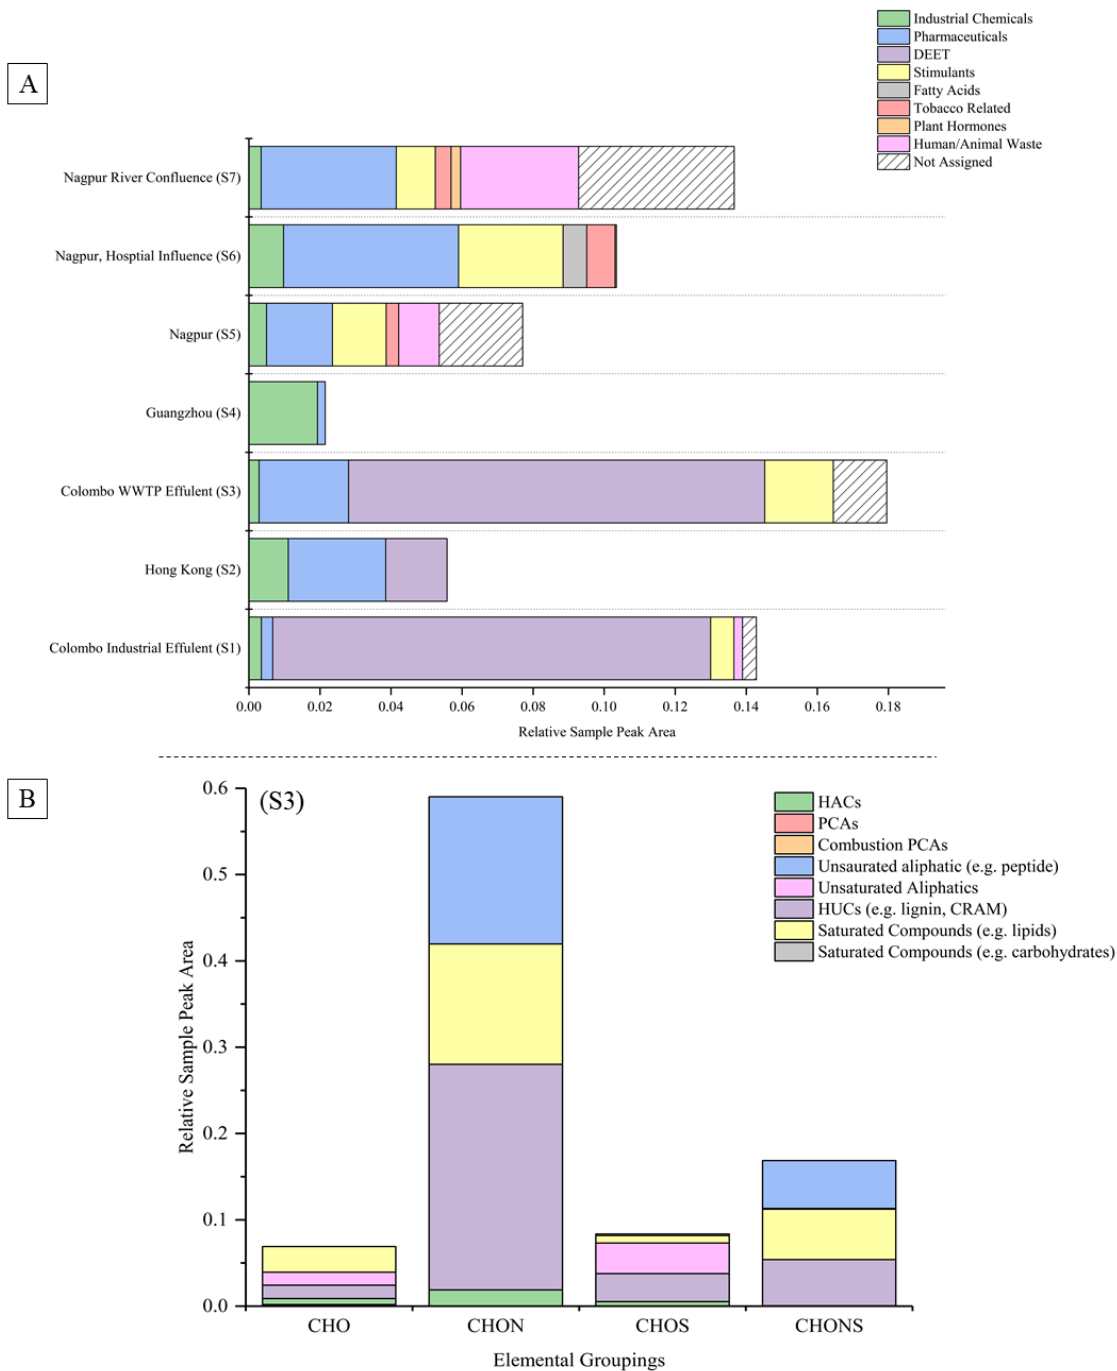

**Figure S10** – The categorized pollutant sources of the compounds tentatively identified using mzCloud with spectral matches >85% confidence (A) and the DOM chemical groupings of wastewater treatment plant (WWTP) effluent collected in Colombo, Sri Lanka (sample S3, see Table S3) (B). Further information regarding the pollutant groupings can be found in the manuscript text. The total number of identified compounds and their assigned pollutant groupings can be found in Table S11.



## References

1. Gao, S.; Surratt, J. D.; Knipping, E. M.; Edgerton, E. S.; Shahgholi, M.; Seinfeld, J. H., Characterization of polar organic components in fine aerosols in the southeastern United States: Identity, origin, and evolution. *Journal of Geophysical Research: Atmospheres* **2006**, *111*, (D14).
2. Hamilton, J. F.; Lewis, A. C.; Carey, T. J.; Wenger, J. C., Characterization of Polar Compounds and Oligomers in Secondary Organic Aerosol Using Liquid Chromatography Coupled to Mass Spectrometry. *Analytical Chemistry* **2008**, *80*, (2), 474-480.
3. Kourtchev, I.; Godoi, R. H. M.; Connors, S.; Levine, J. G.; Archibald, A. T.; Godoi, A. F. L.; Paralovo, S. L.; Barbosa, C. G. G.; Souza, R. A. F.; Manzi, A. O.; Seco, R.; Sjostedt, S.; Park, J. H.; Guenther, A.; Kim, S.; Smith, J.; Martin, S. T.; Kalberer, M., Molecular composition of organic aerosols in central Amazonia: an ultra-high-resolution mass spectrometry study. *Atmos. Chem. Phys.* **2016**, *16*, (18), 11899-11913.
4. Donahue, N.; Chuang, W.; Ortega, I. K.; Riipinen, I.; Riccobono, F.; Schobesberger, S.; Dommen, J.; Kulmala, M.; Worsnop, D.; Vehkamäki, H., How Do Organic Vapors Contribute to New-Particle Formation? *Faraday Discuss.* **2013**.
5. Kalberer, M.; Paulsen, D.; Sax, M.; Steinbacher, M.; Dommen, J.; Prevot, A.; Fisseha, R.; Weingartner, E.; Frankevich, V.; Zenobi, R., Identification of polymers as major components of atmospheric organic aerosols. *Science* **2004**, *303*, (5664), 1659-1662.
6. Koch, B. P.; Dittmar, T., From mass to structure: an aromaticity index for high-resolution mass data of natural organic matter. *Rapid Communications in Mass Spectrometry* **2006**, *20*, (5), 926-932.
7. Melendez-Perez, J. J.; Martínez-Mejía, M. J.; Eberlin, M. N., A reformulated aromaticity index equation under consideration for non-aromatic and non-condensed aromatic cyclic carbonyl compounds. *Organic Geochemistry* **2016**, *95*, 29-33.

8. Kroll, J. H.; Donahue, N. M.; Jimenez, J. L.; Kessler, S. H.; Canagaratna, M. R.; Wilson, K. R.; Altieri, K. E.; Mazzoleni, L. R.; Wozniak, A. S.; Bluhm, H.; Mysak, E. R.; Smith, J. D.; Kolb, C. E.; Worsnop, D. R., Carbon oxidation state as a metric for describing the chemistry of atmospheric organic aerosol. *Nat Chem* **2011**, *3*, (2), 133-139.
9. Stenson, A. C.; Marshall, A. G.; Cooper, W. T., Exact Masses and Chemical Formulas of Individual Suwannee River Fulvic Acids from Ultrahigh Resolution Electrospray Ionization Fourier Transform Ion Cyclotron Resonance Mass Spectra. *Analytical Chemistry* **2003**, *75*, (6), 1275-1284.
10. Hertkorn, N.; Benner, R.; Frommberger, M.; Schmitt-Kopplin, P.; Witt, M.; Kaiser, K.; Kettrup, A.; Hedges, J. I., Characterization of a major refractory component of marine dissolved organic matter. *Geochimica et Cosmochimica Acta* **2006**, *70*, (12), 2990-3010.
